# Supplementary material
Source: Research Square preprint supplement (doi:10.21203/rs.3.rs-9176885/v1)
Supplement: Supplementary file 1 [file 71b37b36d6f38fe0014ec8a4.docx]

**Supplementary materials**

**Cytochrome P450 drives divergent adaptation to quercetin in invasive and native fruit borers**

Bing Bai,1,2,3 Nan-Xia Fu,4 Bo-Kun Wang,1,2,3 Ting-Ting Wen,1,2,3 Xu-Fei Liu,1,2,3 Yun-Tong Lv,1,2,3 Yu-Ting Li,1,2,3 Ping Gao,1,2,3 Jia Li,1,2,3 Yun-He Li,5 and Xue-Qing Yang1,2,3,*

1 College of Plant Protection, Shenyang Agricultural University, Shenyang 110866, Liaoning, China

2Key Laboratory of Economical and Applied Entomology of Liaoning Province, Shenyang 110866, Liaoning, China

3Key Laboratory of Major Agricultural Invasion Biological Monitoring and Control, Shenyang 110866, Liaoning, China

4Tea Research Institute, Chinese Academy of Agricultural Sciences, Hangzhou 310008, China

5State Key Laboratory of Crop Stress Adaptation and Improvement, State KeyLaboratory of Cotton Bio-breeding and Integrated Utilization, School of LifeSciences, Henan University, Kaifeng, China

* Correspondence: xqyang@syau.edu.cn (X.Q. Yang), ORCID ID: 0000-0002-3919-8013

1. **Supplementary tables**

**Table S1.** **Primers used in this study.**

| Primers | Primer sequences |
| --- | --- |
| *CYP333B118-F* | ATGCAAGTGTTAAGAAATCGCATCA |
| *CYP333B118-R* | CTATAGGTCTTTGAATACGAAATGG |
| *CYP333B119-F* | ACATGGGGATATTTTAATATTGTTT |
| *CYP333B119-R* | CTATATGTCATTAAAAATTAAATTAAAAGGCCCAGTTATATAATTA |
| *CYP337B19-F* | ATGTATATTTTTTTGCTGTTGTTCT |
| *CYP337B19-R* | TCACGACTTTTGAGCATGATATCTT |
| *CYP6AB364-F* | ATGTTTTGGCTCATAGCAATTGTTT |
| *CYP6AB364-R* | CTATAAAAGGGGGGTAACTTTGAGC |
| *CYP341Q10-F* | ATGTTTTGGAAGTTACTGGCAGTTG |
| *CYP341Q10-R* | CTAACTTAATTTTCTAGGCTCTAAT |

**Table S2.** **Primers used in full length amplification.**

| Primer name | Primer sequences | Length(bp) |
| --- | --- | --- |
| *CYP333B118-F* | TGGACTCGCTTGCCCTAT | 157 |
| *CYP333B118-R* | AAGACGTTCGGACAATTTCAC |
| *CYP333B119-F* | AGACCACTATCCGAGACCTGA | 124 |
| *CYP333B119-R* | CATCCTTACTCCAAATCCAAAA |
| *CYP337B19-F* | TAAACTATTAGAAGAAAATGAAAAG | 98 |
| *CYP337B19-R* | CGATGCCGAACACTGAAGC |
| *CpEF-1α-F* | CGGCAAATCCACTGAAGATAACC | 170 |
| *CpEF-1α-R* | CCTTGATGACACCTACAGCGACC |
| *Cpβ-ACT-F* | TTGGTATGGGACAGAAGGACTCGT | 227 |
| *Cpβ-ACT-R* | CACGCAGTTCATTGTAGAAGGTG |
| *CYP6AB364-F* | CTTCACGACTCCCTTACTCATC | 247 |
| *CYP6AB364-R* | CAACTTTTCCGCTCTTTCC |
| *CYP341Q10-F* | TGGCAGGGAACCATGAAGAG | 138 |
| *CYP341Q10-R* | CAACGTCAGCAGATACGGGA |
| *GmEF-1α-F* | AGGAGATCGAGCAACAGGAA | 244 |
| *GmEF-1α-R* | CACGACTCTCGGGACTTCTC |
| *Gmβ-ACT-F* | CTTTCACCACCACCGCTG | 222 |
| *Gmβ-ACT -R* | CGCAAGATTCCATACCCA |

**Table S3.** **Primers used in synthesis of dsRNA.**

| Primers | Primer sequences | Length (bp) |
| --- | --- | --- |
| *GFP-F* | TTCAATGCTTTTCCCGTTAT | 254 |
| *GFP-F* | TGTTTGTCTGCCGTGATGTA |
| *CYP333B118-F* | ATCCAGCAAAACAGGAGAAGC | 445 |
| *CYP333B118-R* | GTCGGGGCGATGTGAAG |
| *CYP333B119-F* | ACCAGACTGAACTGCTTTGACC | 412 |
| *CYP333B119-R* | GCTTCTTTTGTTTCTCAGGGTT |
| *CYP337B19-F* | ACGCAAATAGAGGGAACAACC | 359 |
| *CYP337B19-R* | GCAAAGTCGCTGGCACAT |
| *CYP6AB364-F* | TATCTGTGAAGCGAATAATGGTC | 484 |
| *CYP6AB364-R* | TGTCTCCGTGGTGTCCGT |
| *CYP341Q10-F* | TCCAGGCTAAAGCATATCAAG | 465 |
| *CYP341Q10-R* | TTAAGGGCGTGTCATACTCAG |
| *GFP-T7-F* | GGATCCTAATACGACTCACTATAGGTTCAATGCTTTTCCCGTTAT | 304 |
| *GFP-T7-F* | GGATCCTAATACGACTCACTATAGGTGTTTGTCTGCCGTGATGTA |
| *CYP333B118-T7-F* | GGATCCTAATACGACTCACTATAGGATCCAGCAAAACAGGAGAAGC | 495 |
| *CYP333B118-T7-R* | GGATCCTAATACGACTCACTATAGGGTCGGGGCGATGTGAAG |
| *CYP333B119-T7-F* | GGATCCTAATACGACTCACTATAGGACCAGACTGAACTGCTTTGACC | 462 |
| *CYP333B119-T7-R* | GGATCCTAATACGACTCACTATAGGGCTTCTTTTGTTTCTCAGGGTT |
| *CYP337B19-T7-F* | GGATCCTAATACGACTCACTATAGGACGCAAATAGAGGGAACAACC | 409 |
| *CYP337B19-T7-R* | GGATCCTAATACGACTCACTATAGGGCAAAGTCGCTGGCACAT |
| *CYP6AB364-T7-F* | GGATCCTAATACGACTCACTATAGGTATCTGTGAAGCGAATAATGGTC | 534 |
| *CYP6AB364-T7-R* | GGATCCTAATACGACTCACTATAGGTGTCTCCGTGGTGTCCGT |
| *CYP341Q10-T7-F* | GGATCCTAATACGACTCACTATAGGTCCAGGCTAAAGCATATCAAG | 515 |
| *CYP341Q10-T7-R* | GGATCCTAATACGACTCACTATAGGTTAAGGGCGTGTCATACTCAG |

Note：The underscore indicates the T7 promoter sequence.

**Table S4. Upregulated P450 gene (*P* < 0.05) in different generation of *G. molesta* and *C. pomonella* during quercetin adaptation, based on transcriptomic data.**

| **Generation** | ***G. molesta*** | | | | |  | ***C. pomonella*** | | | | |
| --- | --- | --- | --- | --- | --- | --- | --- | --- | --- | --- | --- |
| **Gene ID** | **log2fold change** | ***P* value** | **Gene description** | **Clan** |  | **Gene ID** | **log2fold change** | ***P* value** | **Gene description** | **Clan** |
| **G1 vs G0** | gm_08833_RA | 4.79 | 0.012 | Cyp4d2 | 4 |  | 133531967 | 1.22 | 6.93e-03 | CYP6B2 | 3 |
| gm_40202 | 2.68 | 0.033 | Cyp312a1 | 4 |  | 133528822 | 2.14 | 1.64e-02 | CYP4V2 | 4 |
| gm_32198_RA | 2.78 | 1.09e-06 | Cyp6a14 | 3 |  | 133532049 | 1.01 | 1.67e-02 | CYP6B2 | 3 |
|  |  |  |  |  |  | 133523700 | 0.88 | 2.60e-02 | CYP6B7 | 3 |
|  |  |  |  |  |  | 133531966 | 1.67 | 2.78e-02 | CYP6B2 | 3 |
|  |  |  |  |  |  | 133521276 | 1.14 | 4.19e-02 | Cyp18a1 | 2 |
|  |  |  |  |  |  | 133526773 | 2.74 | 1.44e-05 | Cyp6a20 | 3 |
|  |  |  |  |  |  | 133516276 | 1.04 | 2.17e-05 | CYP6B2 | 3 |
|  |  |  |  |  |  | 133520511 | 6.87 | 2.39e-09 | CYP4V2 | 4 |
|  |  |  |  |  |  | 133528328 | 6.13 | 2.61e-07 | Cyp6a14 | 3 |
|  |  |  |  |  |  | 133520099 | 6.40 | 2.67e-08 | CYP4C1 | 4 |
| **G2 vs G0** | gm_24063_RA | 1.71 | 0.0012 | CYP6B6 | 3 |  | 133533408 | 1.98 | 0.0025 | CYP9E2 | 3 |
| gm_12135_RA | 1.00 | 0.0014 | CYP4C1 | 4 |  | 133530621 | 2.83 | 0.0032 | Cyp6d4 | 3 |
| gm_08833_RA | 6.43 | 0.0015 | Cyp4d2 | 4 |  | 133521778 | 2.34 | 0.010 | CYP9E2 | 3 |
| gm_36075_RA | 1.55 | 0.0045 | CYP307a1 | 2 |  | 133534597 | 2.30 | 0.011 | Cyp9h1 | 3 |
| gm_16211_RA | 1.18 | 0.0076 | CYP9E2 | 3 |  | 133518599 | 0.97 | 0.034 | CYP4C1 | 4 |
| gm_36723_RA | 1.02 | 0.0078 | CYP6B2 | 3 |  | 133521276 | 1.13 | 0.034 | Cyp18a1 | 2 |
| gm_33446_RA | 1.46 | 0.017 | Cyp4d1 | 4 |  | 133529559 | 2.33 | 0.041 | CYP6B6 | 3 |
| gm_07855_RB | 1.63 | 0.039 | CYP4C1 | 4 |  | 133532049 | 0.60 | 0.043 | CYP6B2 | 3 |
| gm_33486_RB | 0.85 | 0.049 | CYP3A6 | 4 |  | 133530622 | 1.23 | 0.044 | CYP6B7 | 3 |
|  |  |  |  |  |  | 133526987 | 5.52 | 5.47e-08 | Cyp6a14 | 3 |
|  |  |  |  |  |  | 133528328 | 5.63 | 7.022e-08 | Cyp6a14 | 3 |
| **G3 vs G0** | gm_36654_RA | 1.01 | 0.00016 | CYP6B2 | 3 |  | 133526773 | 1.84 | 0.0015 | Cyp6a20 | 3 |
| gm_31939_RB | 1.55 | 0.00039 | CYP6B6 | 3 |  | 133528982 | 1.29 | 0.0043 | CYP4V2 | 4 |
| gm_40204 | 4.31 | 0.00097 | Cyp312a1 | 4 |  | 133521821 | 0.64 | 0.022 | CYP6B2 | 3 |
| gm_33486_RB | 1.34 | 0.011 | CYP3A6 | 4 |  | 133520511 | 1.50 | 0.026 | CYP4V2 | 4 |
| gm_24063_RA | 1.58 | 0.029 | CYP6B6 | 3 |  | 133528907 | 3.15 | 1.46e-10 | CYP6B2 | 3 |
| gm_39706 | 0.97 | 0.033 | CYP9E2 | 3 |  | 133528822 | 1.55 | 2.90e-05 | CYP4V2 | 4 |
| gm_40202 | 6.33 | 4.22e-10 | Cyp312a1 | 4 |  | 133528328 | 3.15 | 5.13e-05 | Cyp6a14 | 3 |
|  |  |  |  |  |  | 133528766 | 1.89 | 5.57e-12 | CYP6B7 | 3 |
|  |  |  |  |  |  | 133520099 | 3.97 | 8.52e-09 | CYP4C1 | 4 |
| **G4 vs G0** |  |  |  |  |  |  | 133529559 | 2.91 | 0.00039 | CYP6B6 | 3 |
|  |  |  |  |  |  | 133521276 | 1.19 | 0.0011 | Cyp18a1 | 2 |
|  |  |  |  |  |  | 133517322 | 1.54 | 0.011 | CYP12A2 | mito |
|  |  |  |  |  |  | 133529163 | 1.06 | 0.027 | CYP6B2 | 3 |
|  |  |  |  |  |  | 133529744 | 2.80 | 0.029 | Cyp313a4 | 4 |
|  |  |  |  |  |  | 133520099 | 1.32 | 0.036 | CYP4C1 | 4 |
|  |  |  |  |  |  | 133527208 | 1.26 | 0.048 | CYP6B6 | 3 |
|  |  |  |  |  |  | 133519685 | 1.45 | 0.049 | CYP6B6 | 3 |
|  |  |  |  |  |  | 133526987 | 5.77 | 1.27e-11 | Cyp6a14 | 3 |
|  |  |  |  |  |  | 133533408 | 2.68 | 1.76e-05 | CYP9E2 | 3 |
|  |  |  |  |  |  | 133521778 | 4.02 | 4.02e-10 | CYP9E2 | 3 |

**Table S5. Top 20 up-regulated genes and proteins in the transcriptome and proteome of *G. molesta*.**

| **Transcriptome** | | | | **Proteome** | | | |
| --- | --- | --- | --- | --- | --- | --- | --- |
| **gene_id** | **log2FoldChange** | ***P* value** | **Description** | **Protein** | **Fold Change** | ***P* value** | **Description** |
| gm_12094_RA | 8.01 | 4.36E-07 | uncharacterized | ofm_gm_18314_RA | 7.83 | 2.36E-02 | Probable Rho GTPase-I15278 melanogaster |
| gm_31742_RA | 6.72 | 1.79E-02 | DM4/DM12 family | ofm_gm_12378_RA | 6.31 | 1.07E-03 | Gamma interferon inducible lysosomal thiol reductase (GILT) |
| gm_40202 | 6.34 | 4.22E-10 | P450 312a1 | ofm_gm_02710_RA | 5.04 | 4.74E-02 | FK506-binding protein 2 |
| gm_07943_RA | 6.31 | 1.36E-02 | Integrase zinc binding domain | ofm_gm_33907_RA | 4.79 | 5.03E-03 | uncharacterized |
| gm_07894_RA | 6.20 | 3.90E-03 | uncharacterized | ofm_gm_02514_RA | 4.45 | 2.10E-02 | uncharacterized |
| gm_36478_RA | 6.15 | 2.95E-03 | Domain of unknown function | ofm_gm_38270_RA | 4.23 | 1.87E-02 | uncharacterized |
| gm_22088_RA | 6.14 | 4.76E-03 | L-sorbose 1-dehydrogenase | ofm_gm_01753_RA | 3.82 | 4.99E-02 | Proton-coupled amino acid transporter-like protein CG1139 |
| gm_36483_RA | 5.73 | 2.08E-03 | Domain of unknown function | ofm_gm_01297_RA | 3.60 | 2.04E-02 | Dynactin subunit p22 |
| gm_07964_RA | 5.72 | 4.52E-02 | uncharacterized | ofm_gm_12352_RA | 3.58 | 4.89E-02 | Dynactin subunit p22 |
| gm_39712 | 5.70 | 1.18E-06 | DM4/DM12 family | ofm_gm_05192_RA | 3.53 | 8.04E-03 | uncharacterized |
| gm_34357_RA | 5.58 | 1.46E-02 | FAM183A and FAM183B related | ofm_gm_06807_RA | 3.47 | 8.99E-04 | uncharacterized |
| gm_16029_RA | 5.56 | 7.08E-05 | Domain of unknown function | ofm_gm_21681_RA | 3.40 | 2.83E-02 | MOUSE Cytochrome c oxidase |
| gm_12096_RA | 5.41 | 1.71E-08 | uncharacterized | ofm_gm_39920 | 3.21 | 1.79E-02 | Facilitated trehalose |
| gm_32000_RA | 5.21 | 7.15E-09 | Pancreatic lipase-related protein | ofm_gm_05425_RA | 3.01 | 1.71E-02 | uncharacterized |
| gm_02229_RA | 5.11 | 3.26E-09 | CUB domain | ofm_gm_31032_RA | 2.91 | 3.58E-02 | Motile sperm domain-containing protein 1 |
| gm_05074_RA | 4.98 | 4.76E-03 | UGT2 | ofm_gm_25720_RA | 2.86 | 1.78E-03 | Retinal dehydrogenase 1 |
| gm_37336_RA | 4.82 | 5.72E-03 | Scramblase | ofm_gm_21258_RA | 2.85 | 3.07E-02 | Luciferin 4-monooxygenase |
| gm_39934 | 4.81 | 1.64E-02 | uncharacterized | ofm_gm_09507_RA | 2.84 | 1.37E-02 | Luciferin 4-monooxygenase |
| gm_39592 | 4.80 | 1.34E-02 | DNA polymerase from transposon | ofm_gm_34553_RC | 2.75 | 7.06E-04 | uncharacterized |

**Table S6. Top 20 up-regulated genes and proteins in the transcriptome and proteome of *C. pomonella*.**

| **Transcriptome** | | | | **Proteome** | | | |
| --- | --- | --- | --- | --- | --- | --- | --- |
| **gene_id** | **log2FoldChange** | ***P* value** | **Description** | **Protein** | **Fold Change** | ***P* value** | **Description** |
| 133529789 | 9.94 | 1.05E-13 | uncharacterized | XP_061720725.1 | 22.53 | 3.63E-05 | CYP12A2 |
| 133527378 | 9.92 | 7.22E-19 | Cuticle protein 2 | XP_061706493.1 | 5.18 | 2.06E-02 | CYP6B5 |
| 133518299 | 9.80 | 1.78E-46 | uncharacterized | XP_061711424.1 | 3.92 | 5.27E-06 | Pro aminopeptidase 1 |
| 133529797 | 9.79 | 6.08E-32 | uncharacterized | XP_061726473.1 | 3.85 | 2.20E-02 | uncharacterized protein |
| 133525903 | 9.73 | 5.17E-16 | uncharacterized | XP_061730163.1 | 3.61 | 4.18E-04 | transporter |
| 133523595 | 9.65 | 3.96E-08 | uncharacterized | XP_061705068.1 | 3.39 | 4.05E-03 | uncharacterized protein |
| 133533764 | 9.64 | 1.02E-18 | Cuticle protein | XP_061706220.1 | 3.12 | 1.34E-03 | uncharacterized protein |
| 133533235 | 9.59 | 2.17E-74 | uncharacterized | XP_061714331.1 | 3.07 | 1.17E-02 | Circadian clock_controlled protein |
| 133515409 | 9.58 | 4.36E-08 | histidine-rich glycoprotein-like | XP_061708353.1 | 3.03 | 4.07E-02 | heat shock protein |
| 133525902 | 9.39 | 1.63E-28 | ankyrin repeat and KH domain-containing protein mask-like | XP_061725656.1 | 2.99 | 4.55E-02 | ferritin heavy chain |
| 133520825 | 9.36 | 3.93E-31 | skin secretory protein | XP_061719303.1 | 2.99 | 3.15E-02 | uncharacterized protein |
| 133533568 | 9.36 | 9.33E-13 | MAGE-like protein 2 | XP_061725383.1 | 2.80 | 1.21E-02 | protein masquerade |
| 133534413 | 9.32 | 1.08E-74 | tol-Pal system protein TolA-like%2C transcript variant | XP_061725635.1 | 2.75 | 1.48E-02 | uncharacterized protein |
| 133519919 | 9.29 | 1.20E-13 | Cuticle protein 8 | XP_061711769.1 | 2.74 | 2.64E-02 | secretory phospholipase A2 receptor_like |
| 133515794 | 9.15 | 1.86E-10 | Trypsin | XP_061721493.1 | 2.71 | 3.57E-03 | N_acylneuraminate_9_phosphatase |
| 133519920 | 9.15 | 1.85E-03 | cuticle protein | XP_061710351.1 | 2.62 | 3.30E-02 | aspartate_glycine_lysine and serine_rich protein |
| 133519903 | 9.12 | 5.83E-12 | cuticle protein 8-like | XP_061725636.1 | 2.61 | 1.81E-02 | enteropeptidase_like isoform X2 |
| 133529683 | 9.11 | 1.31E-06 | uncharacterized | XP_061724293.1 | 2.48 | 4.87E-02 | myrosinase 1_like Cydia pomonella |
| 133524029 | 9.07 | 1.57E-46 | keratin%2C type I cytoskeletal 9 | XP_061706469.1 | 2.37 | 5.80E-05 | arylsulfatase I |

1. **Supplementary figures**


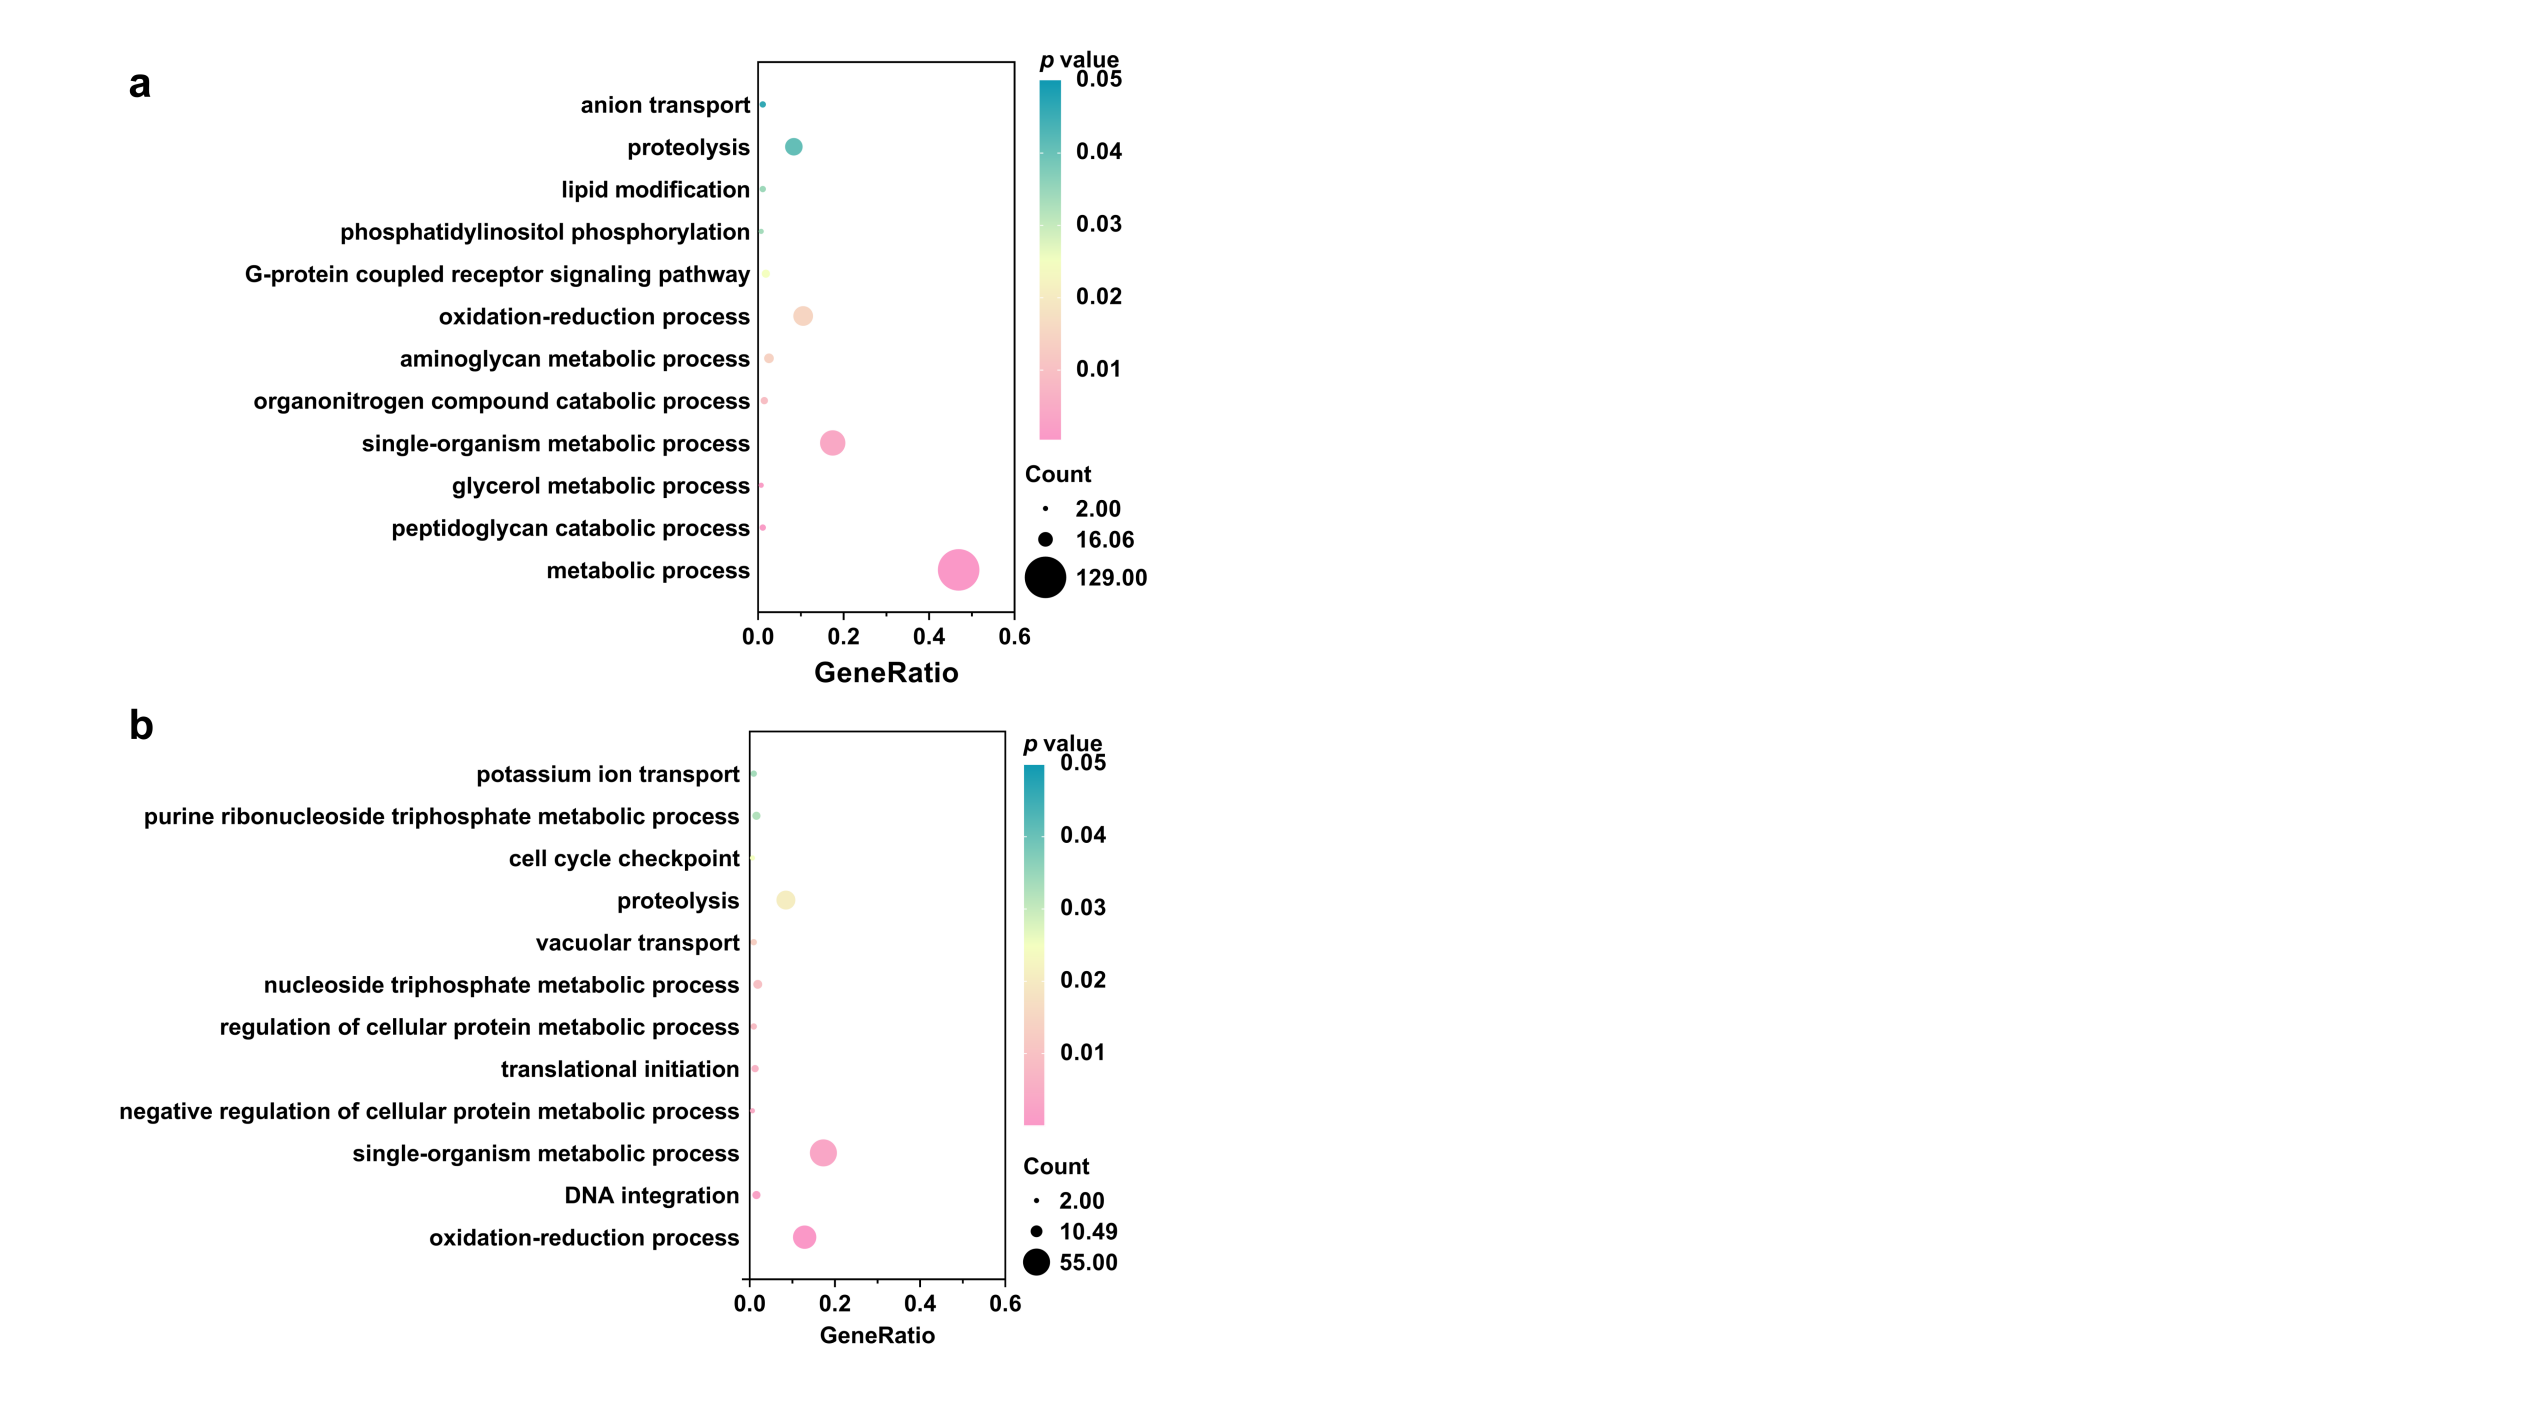


**Figure S1. The enriched GO terms of the DGPs of *G. molesta* and *C. pomonella* adapted by quercetin.** a, GO term enrichment in *G. molesta*. b, GO term enrichment in *C. pomonella*. Only the first 12 GO terms were presented based on the enrichment confidence levels (*P* value < 0.05). Figures were visualized using GraphPad Prism 9 software (GraphPad Software, CA).


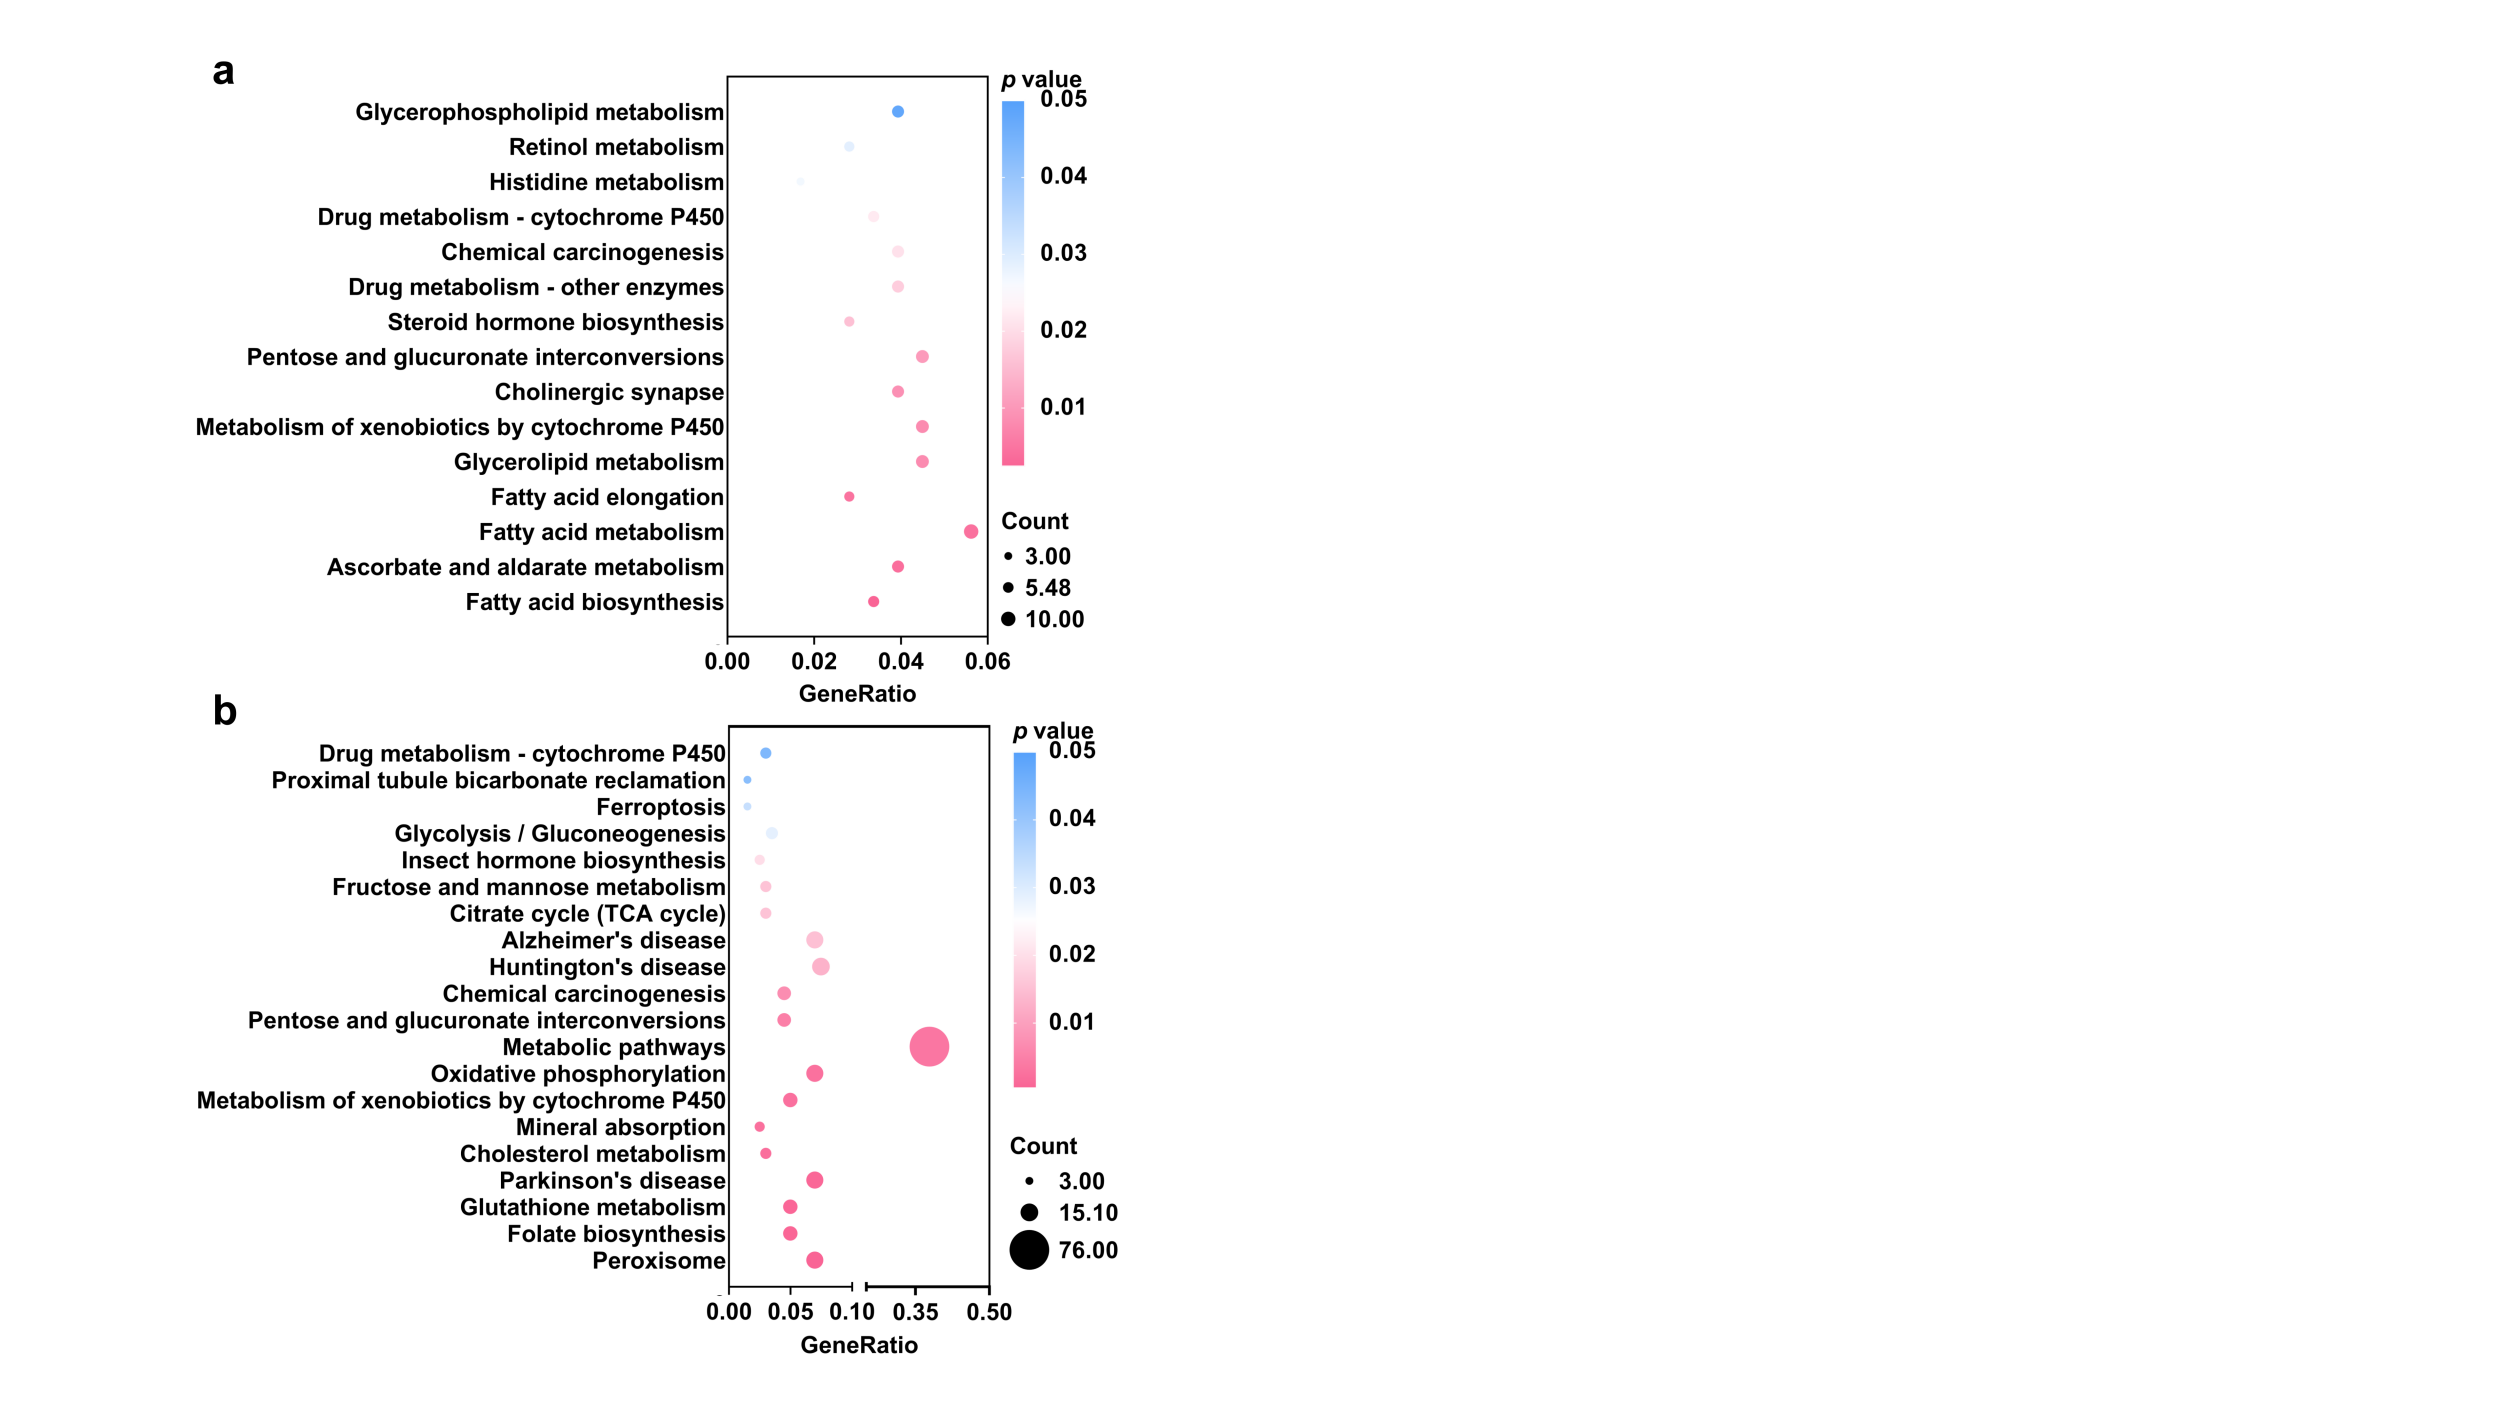


**Figure S2.** **The KEGG pathways of the DGPs of *G. molesta* (a) and *C. pomonella* (b).** KEGG pathways were presented based on the enrichment confidence levels (*P* value < 0.05). Figures were visualized using GraphPad Prism 9 software (GraphPad Software, CA).


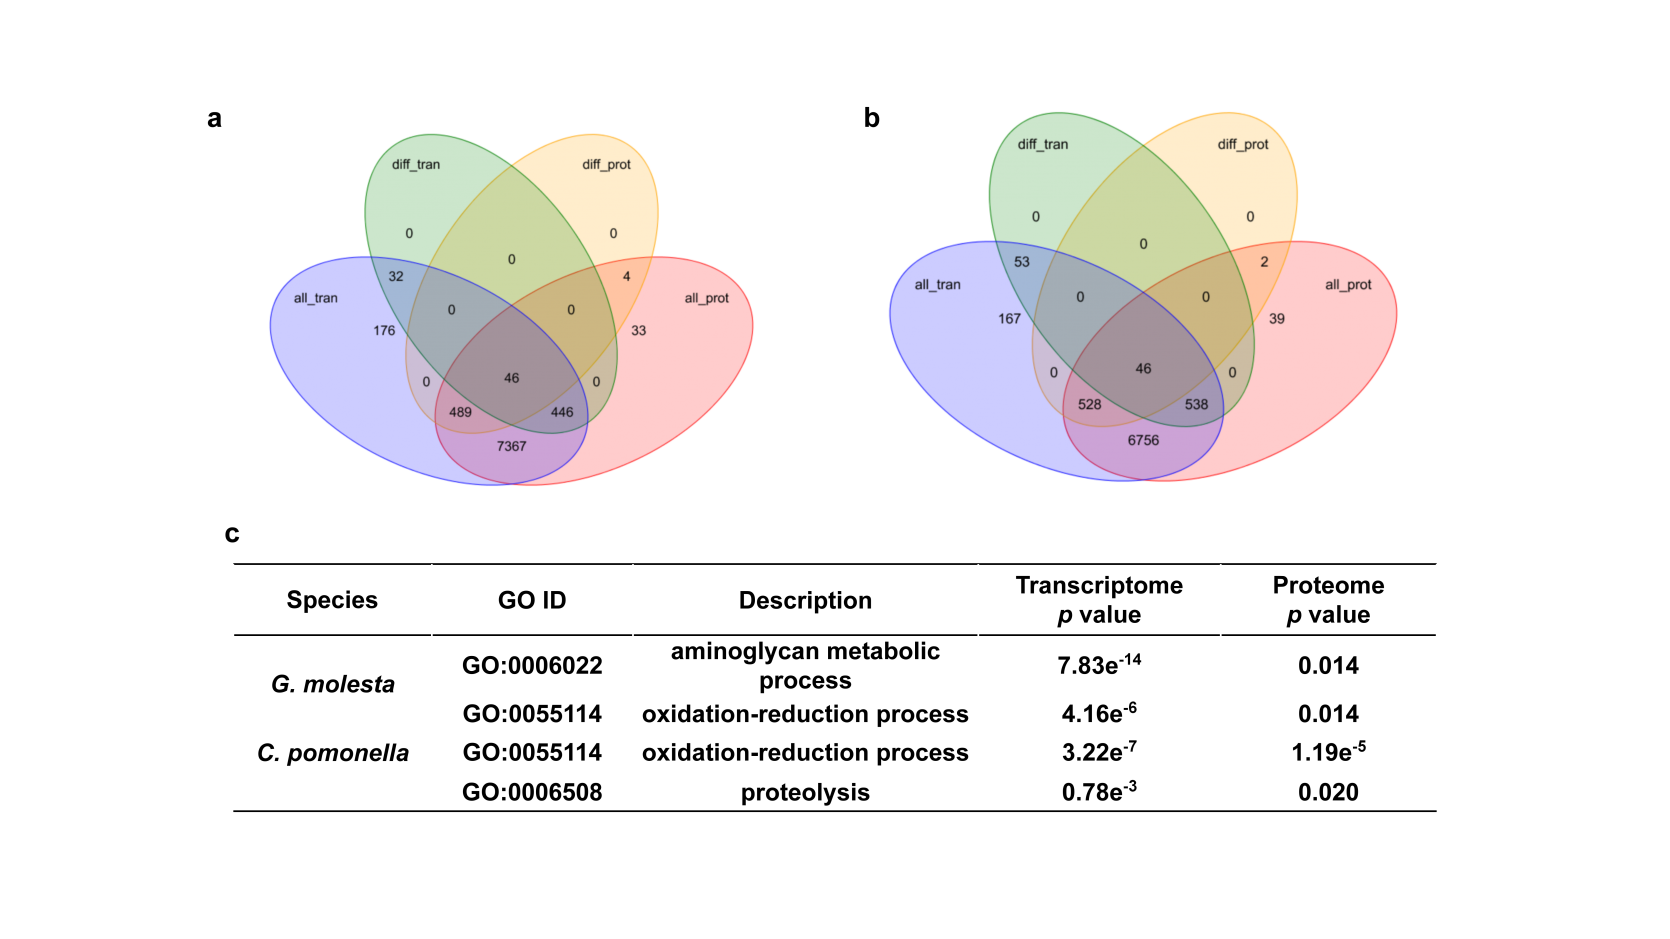


**Figure S3.** **Transcriptome and proteome association analysis**. a, Venn diagram of transcriptome and proteome of *G. molesta*. b, Venn diagram of transcriptome and proteome of *C. pomonella*.*.* all_tran : all genes in the transcriptome; diff_tran: the differentially expressed genes in the transcriptome; all_prot : all proteins in the proteome; diff_prot: the differentially expressed proteins in the proteome.


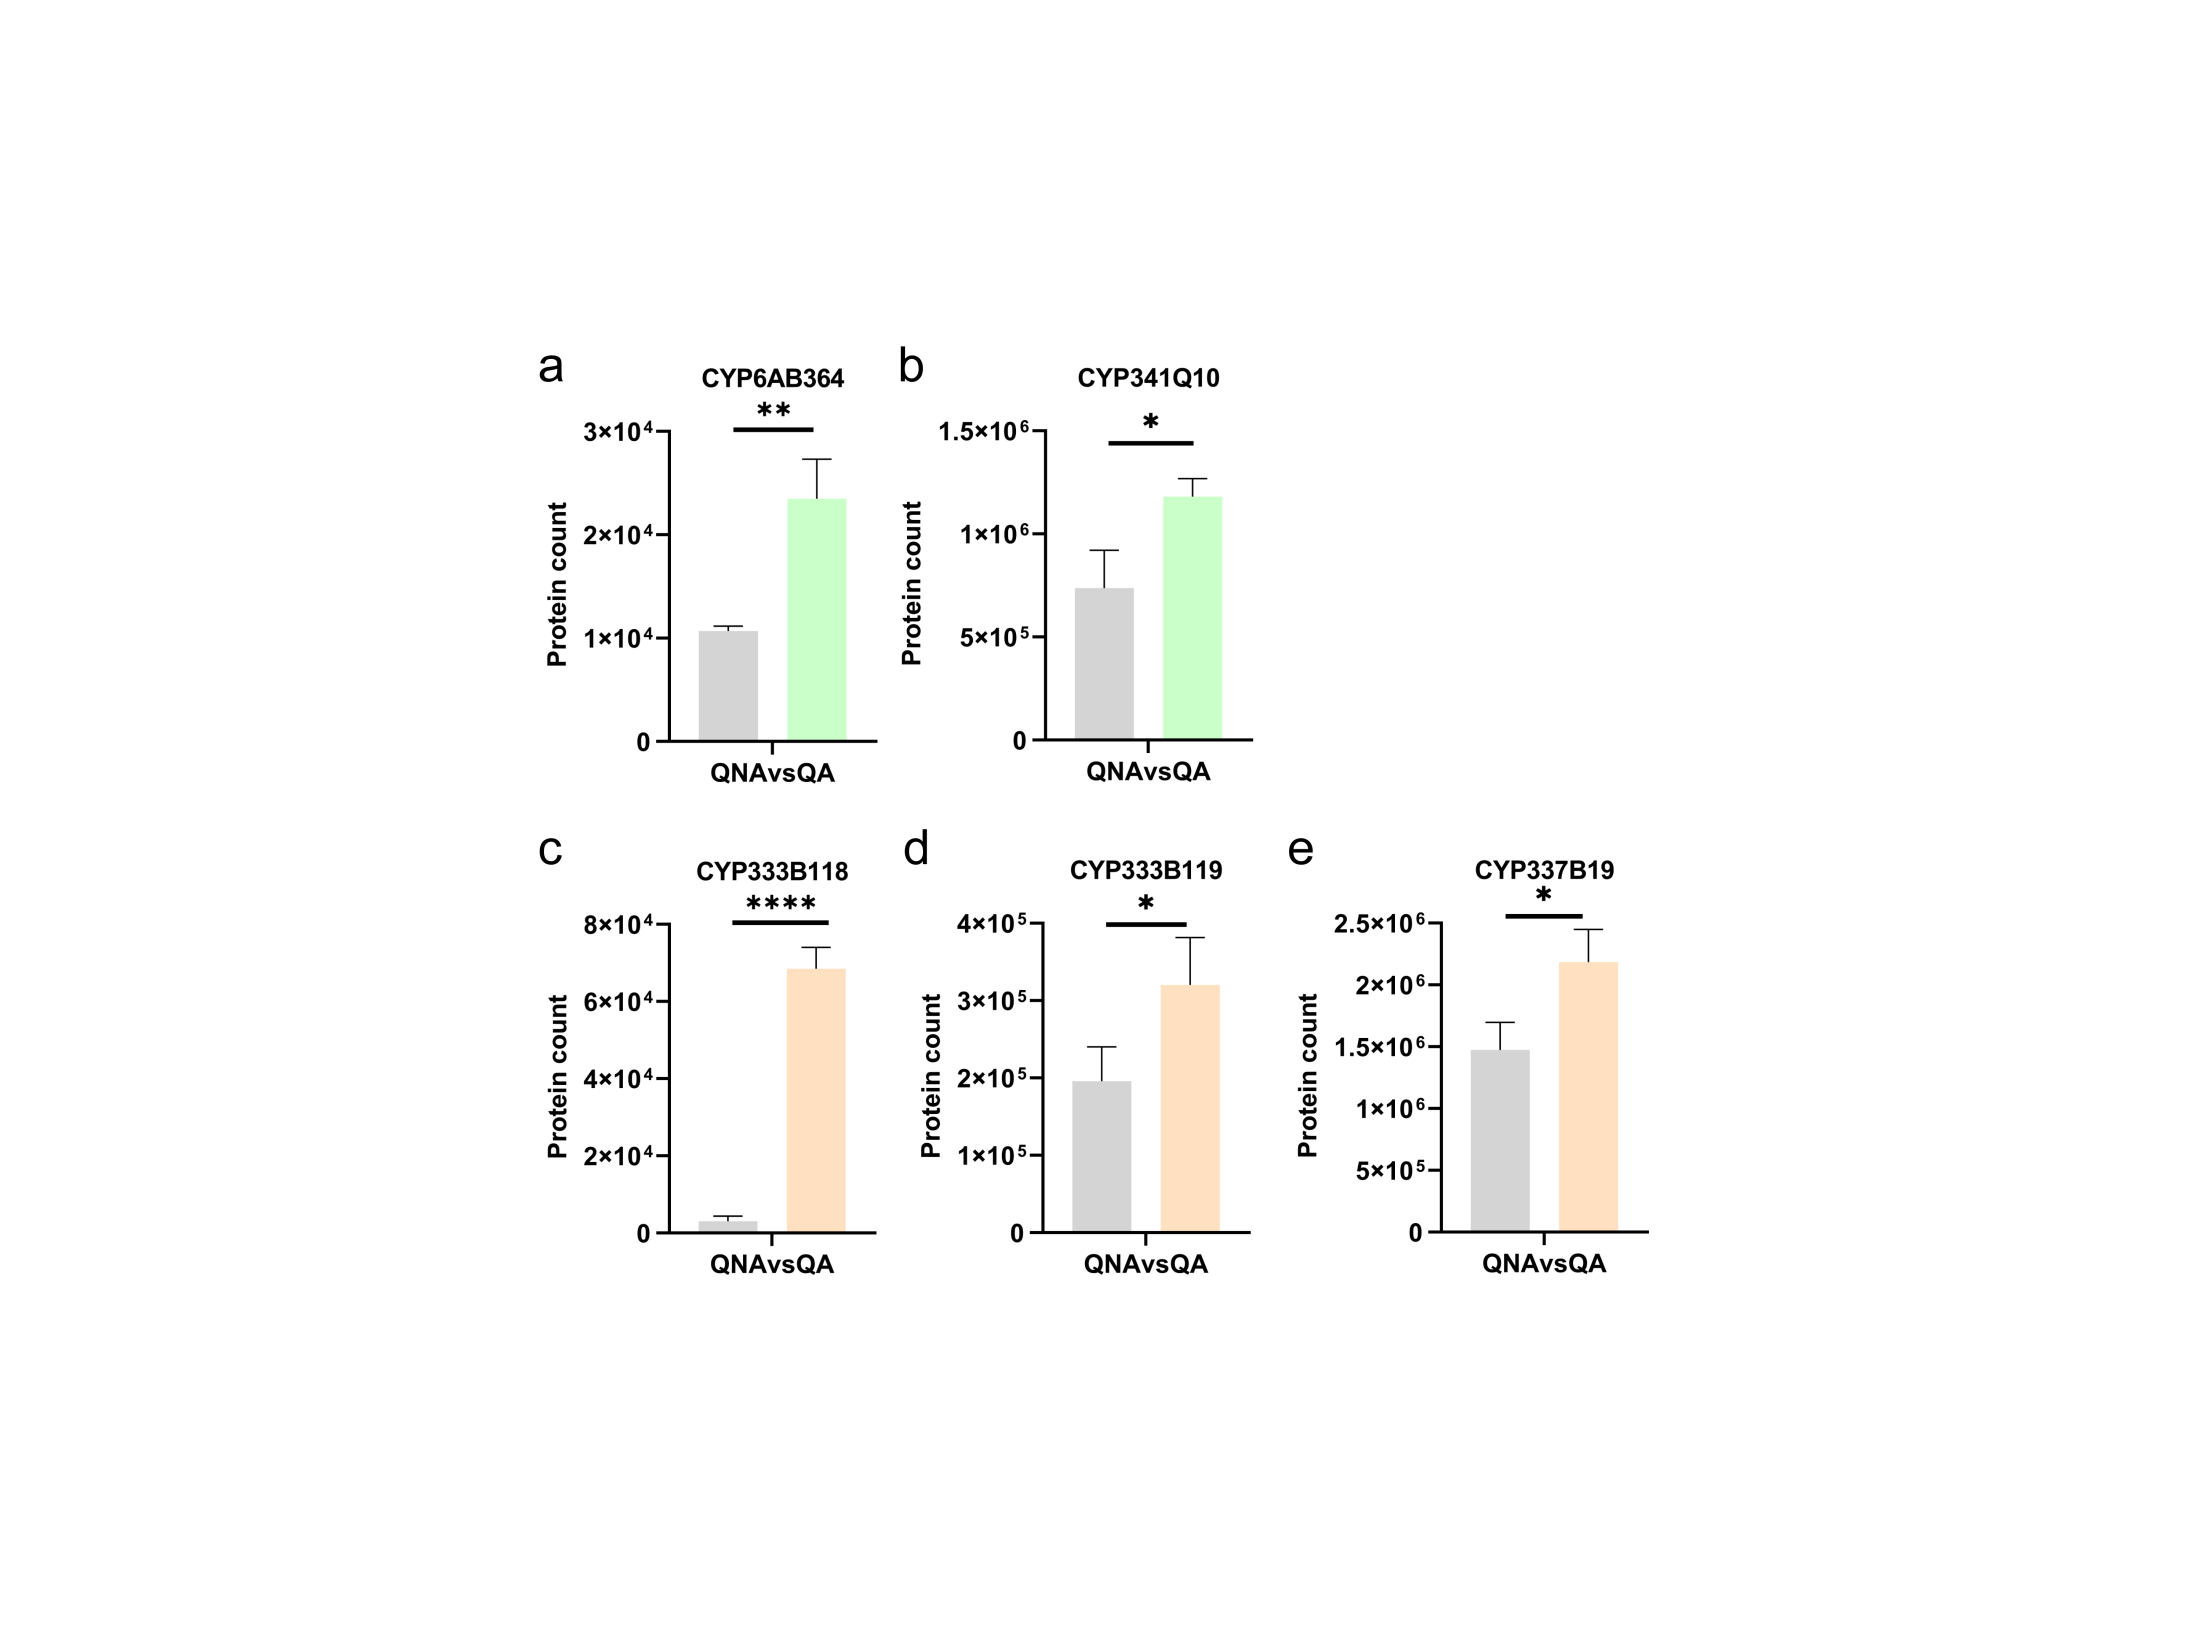


**Figure S4.** **Quercetin-adapted key P450 protein count of *G. molesta* and *C. pomonella*.** a-b, were the protein count of CYP6AB364 and CYP341Q10 in quercetin-non-adapted (QNA) and quercetin-adapted (QA) *G. molesta*, respectively. c-e, were the protein count of CYP333B118, CYP333B119, and CYP337B19 in quercetin-non-adapted (QNA) and quercetin-adapted (QA) *C. pomonella*, respectively. All data were presented as the mean of three replicates ± standard deviation (SD), the differences between different groups were based on Student’ s *t* test (*****P* < 0.0001; ****P* < 0.001; ***P* < 0.01; **P* < 0.05; ns, *P* > 0.05). Figures were visualized using GraphPad Prism 9 software (GraphPad Software, CA).

*
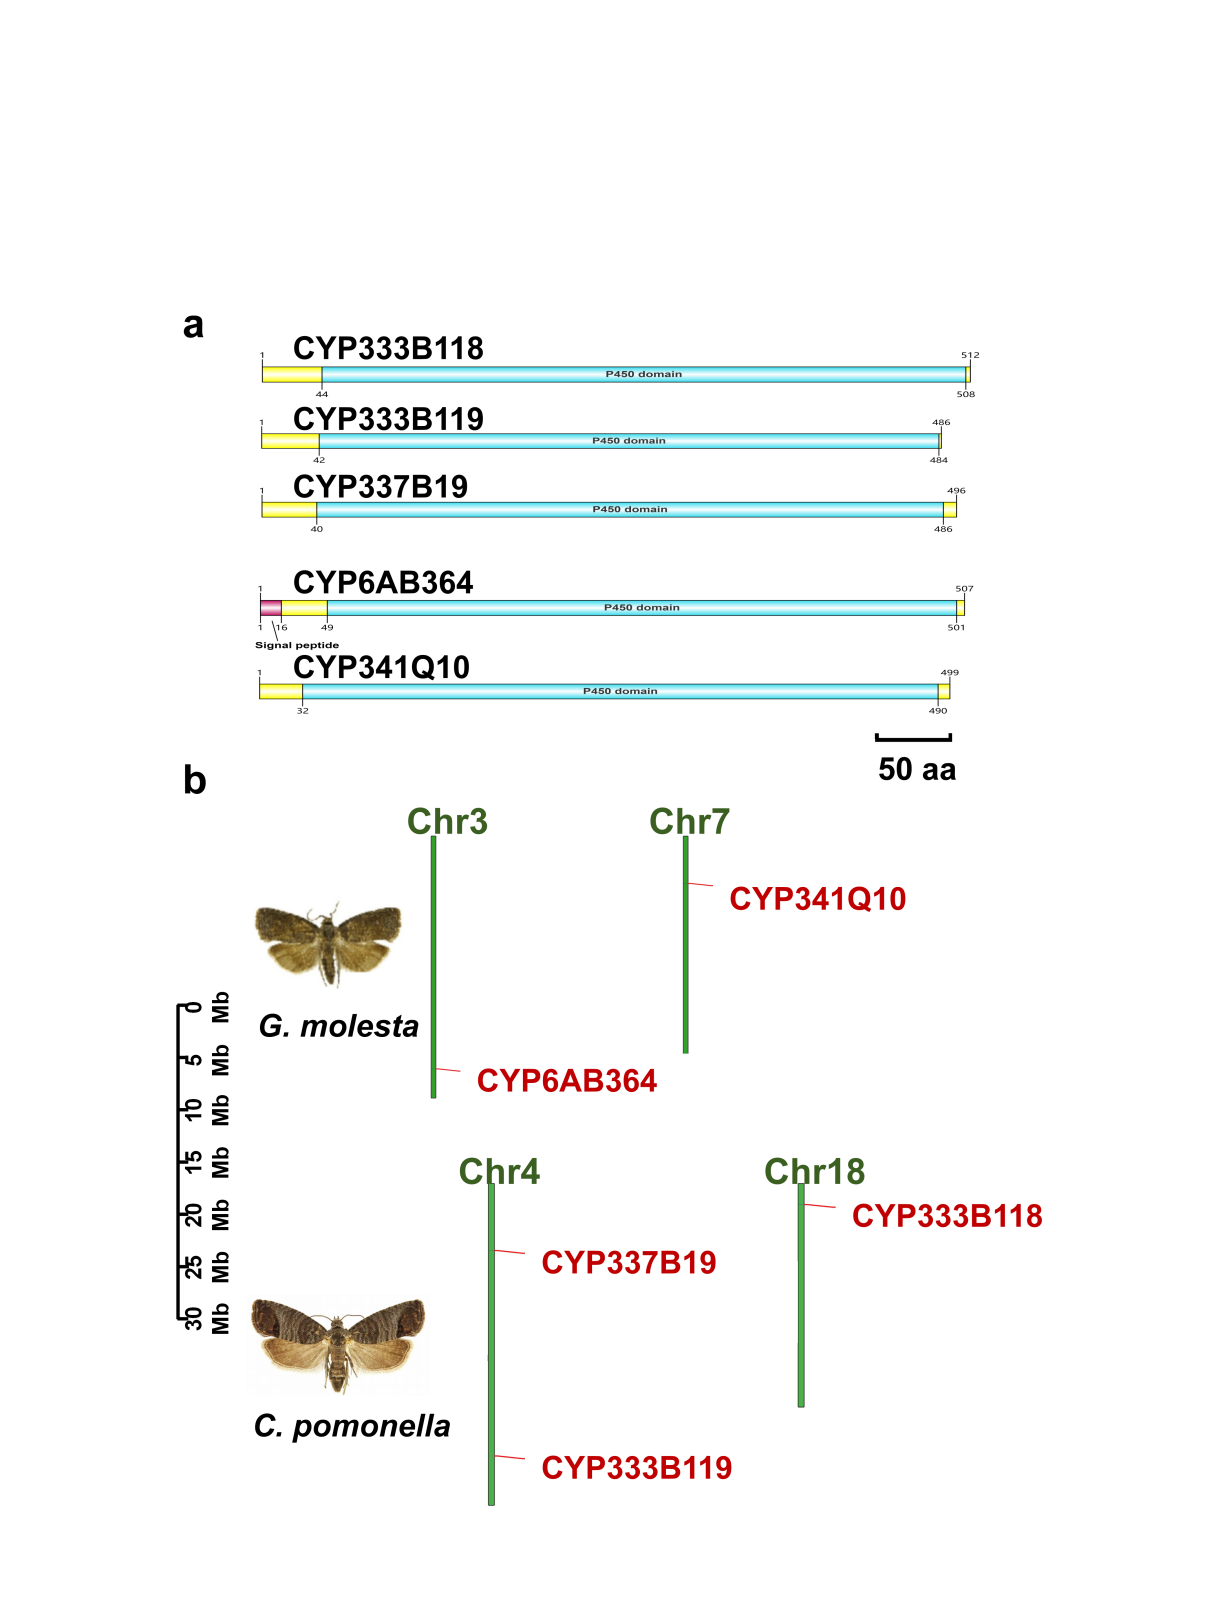
*

**Figure S5. Bioinformatics analysis of P450s of *G. molesta* and *C. pomonella*.** a, Schematic depiction of domain organization of P450 proteins and figure was visualized using IBS 2.0 (Illustrator for Biological Sequences). b, Physical map of P450 genes and figure was visualized using TBtools-Ⅱ.


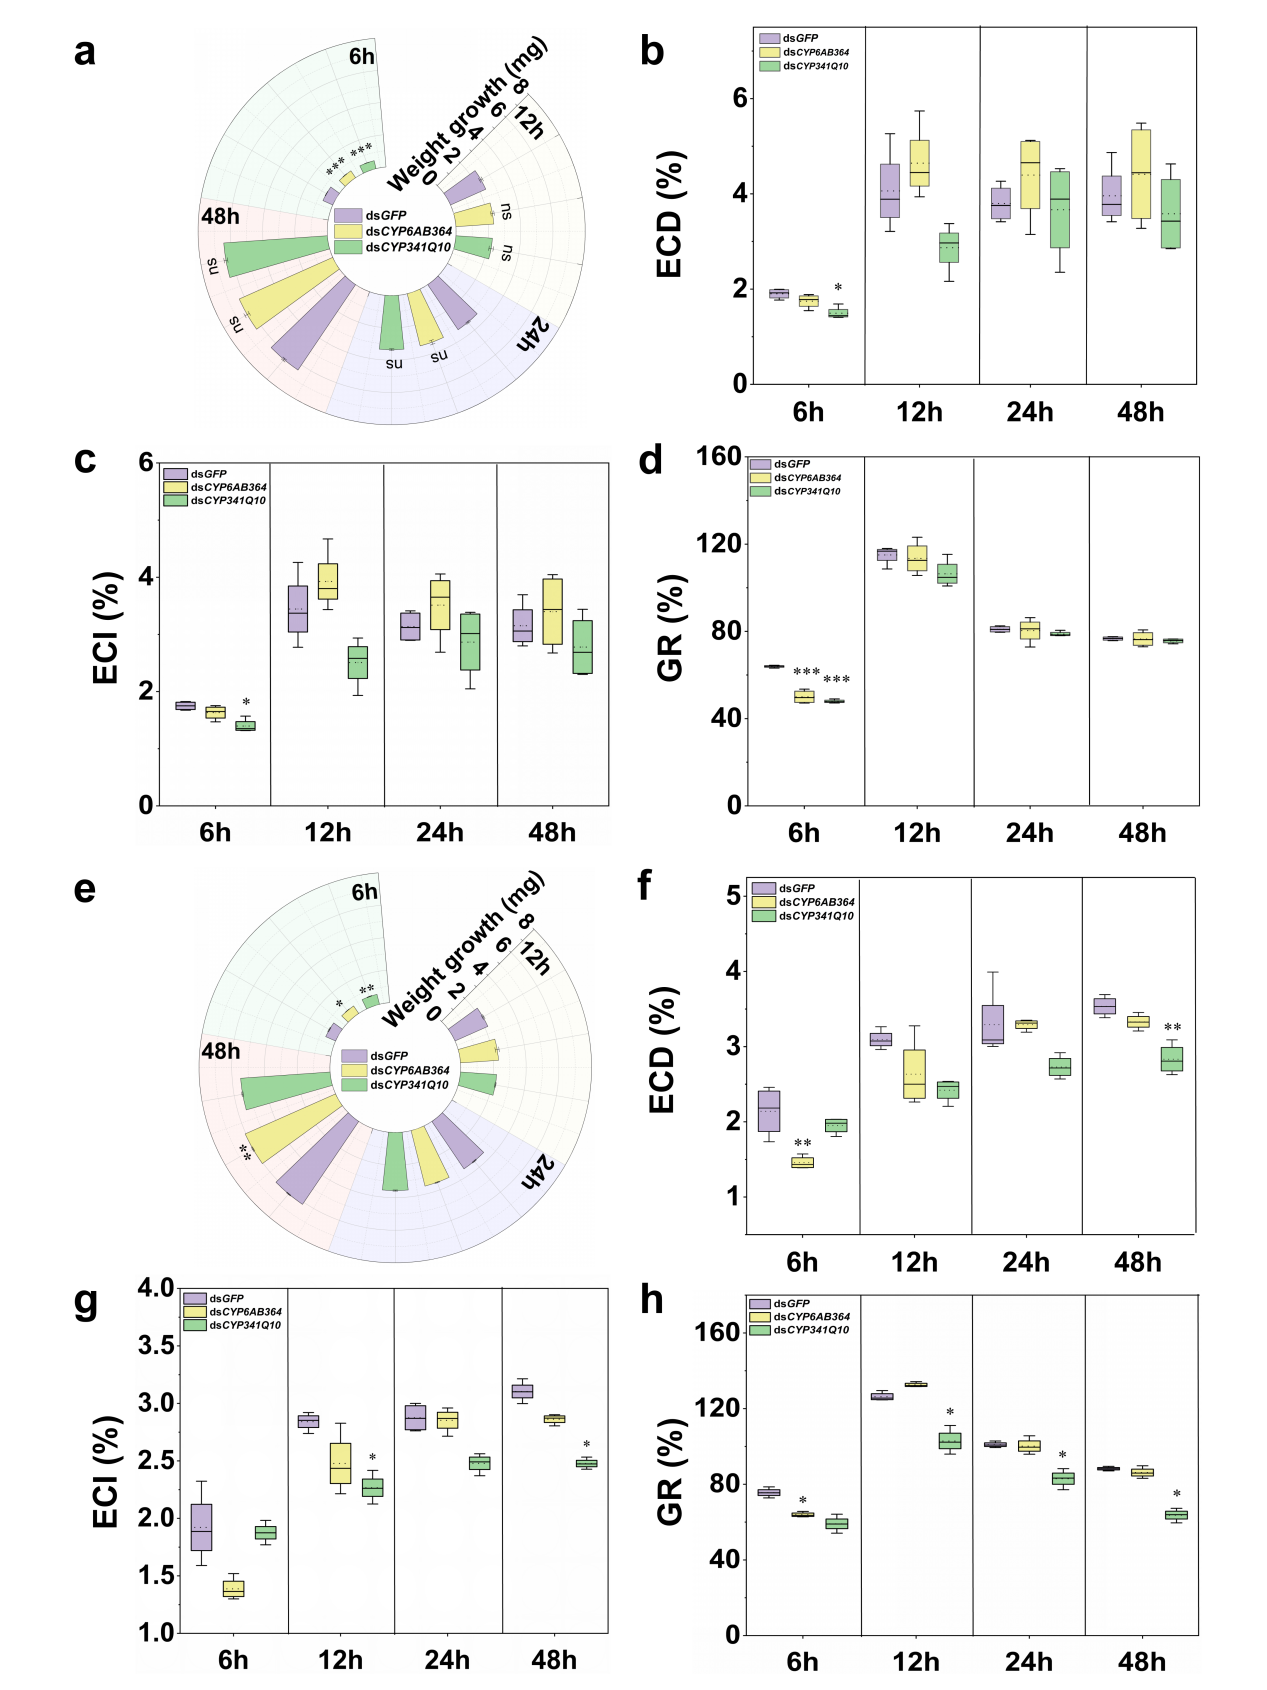


**Figure S6.** **Nutritional indices of quercetin-non-adapted (QNA) and quercetin-adapted (QA) strains of *G. molesta* fed on quercetin-free diets (QF).** a-d, Weight growth, efficiency of conversion of digested food, efficiency of conversion of ingested food, and relative growth rate of quercetin-non-adapted strains (QNA) *G. molesta* fed on quercetin-free diets (QF). e-h, Weight growth, efficiency of conversion of digested food, efficiency of conversion of ingested food, and relative growth rate of quercetin-adapted strains (QA) *G. molesta* fed on quercetin-free diets (QF). All data were presented as the mean of three replicates ± standard deviation (SD), the differences between different groups were based on Student’ s *t* test (*****P* < 0.0001; ****P* < 0.001; ***P* < 0.01; **P* < 0.05). All data were plotted using Origin 2001 software.


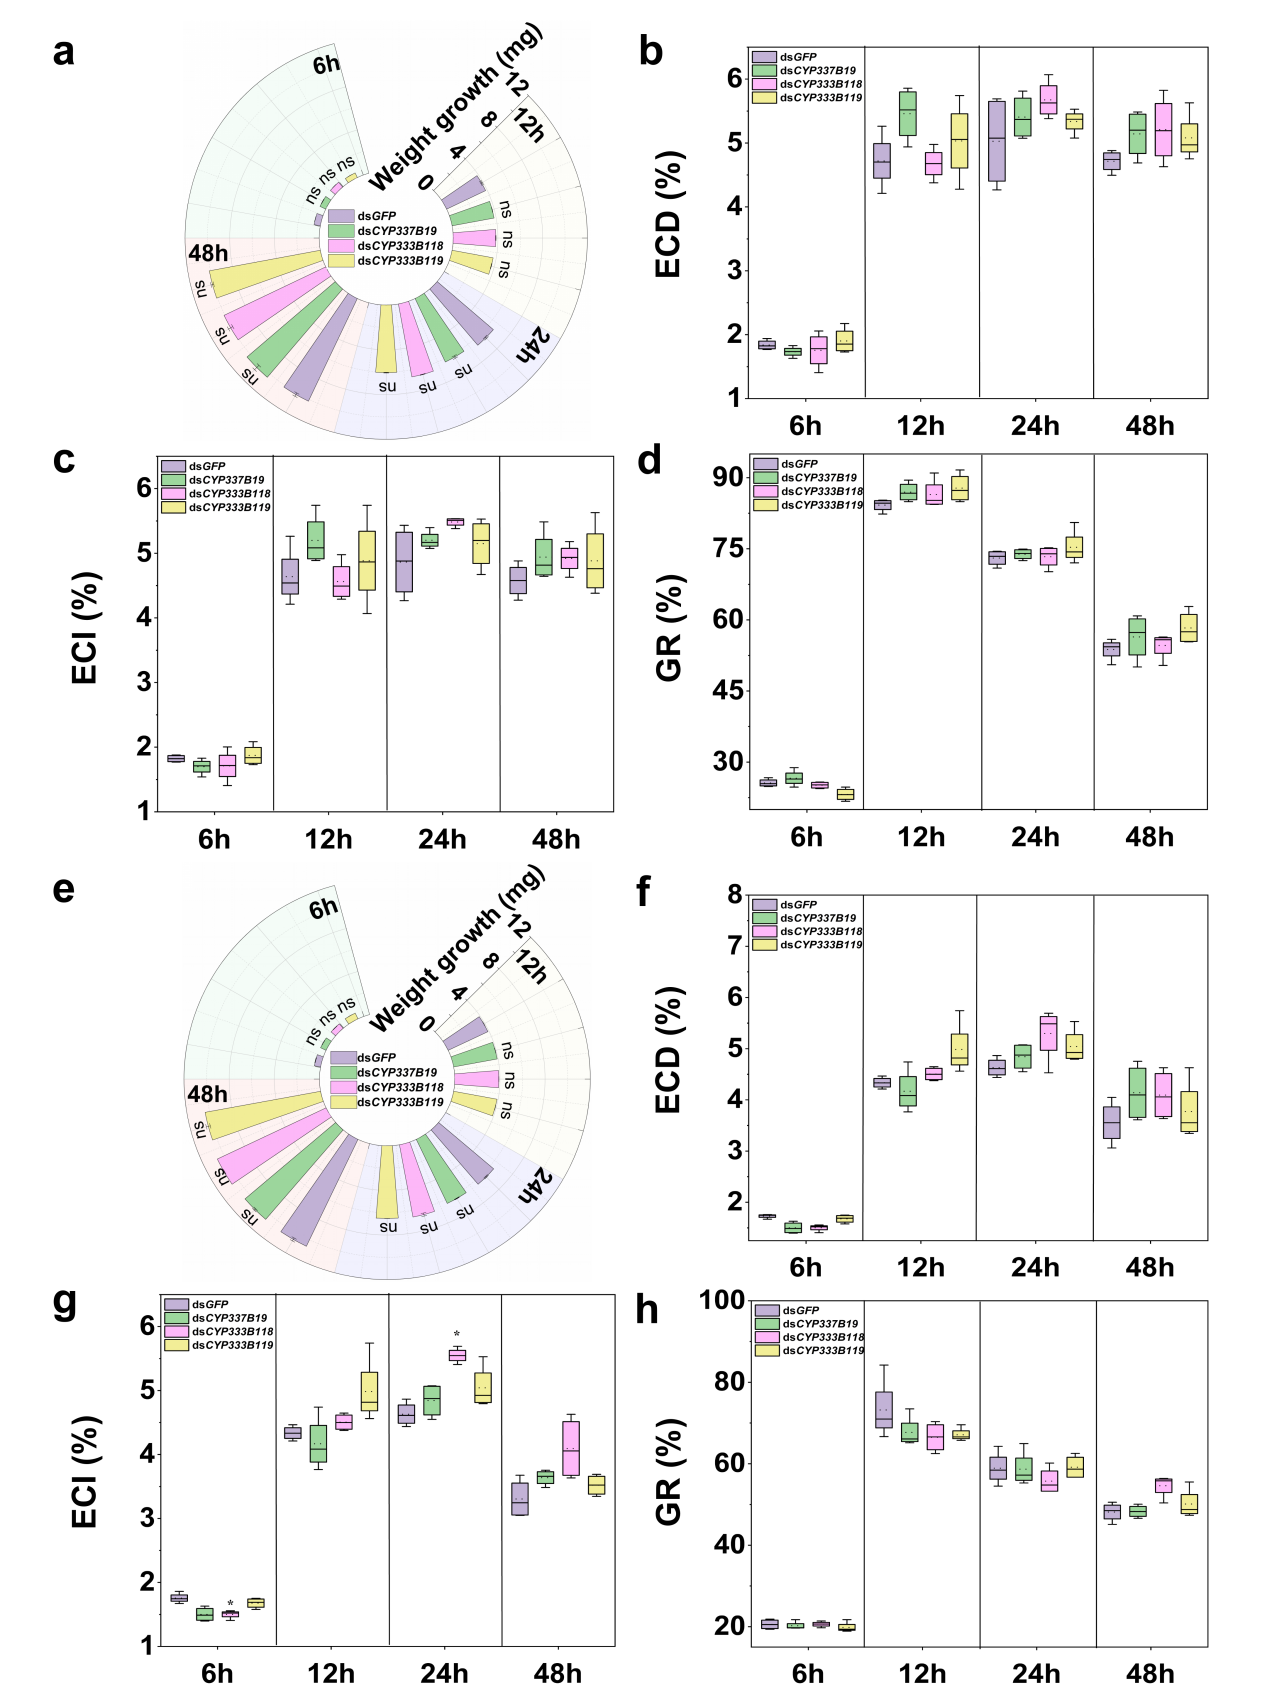


**Figure S7.** **Nutritional indices of quercetin-non-adapted (QNA) and quercetin-adapted (QA) strains of *C. pomonella* fed on quercetin-free diets (QF).** a-d, Weight growth, efficiency of conversion of digested food, efficiency of conversion of ingested food, and relative growth rate of quercetin-non-adapted strains (QNA) *C. pomonella* fed on quercetin-free diets (QF). e-h, Weight growth, efficiency of conversion of digested food, efficiency of conversion of ingested food, and relative growth rate of quercetin-adapted strains (QA) *C. pomonella* fed on quercetin-free diets (QF). All data were presented as the mean of three replicates ± standard deviation (SD), the differences between different groups were based on Student’ s *t* test (*****P* < 0.0001; ****P* < 0.001; ***P* < 0.01; **P* < 0.05). All data were plotted using Origin 2001 software.


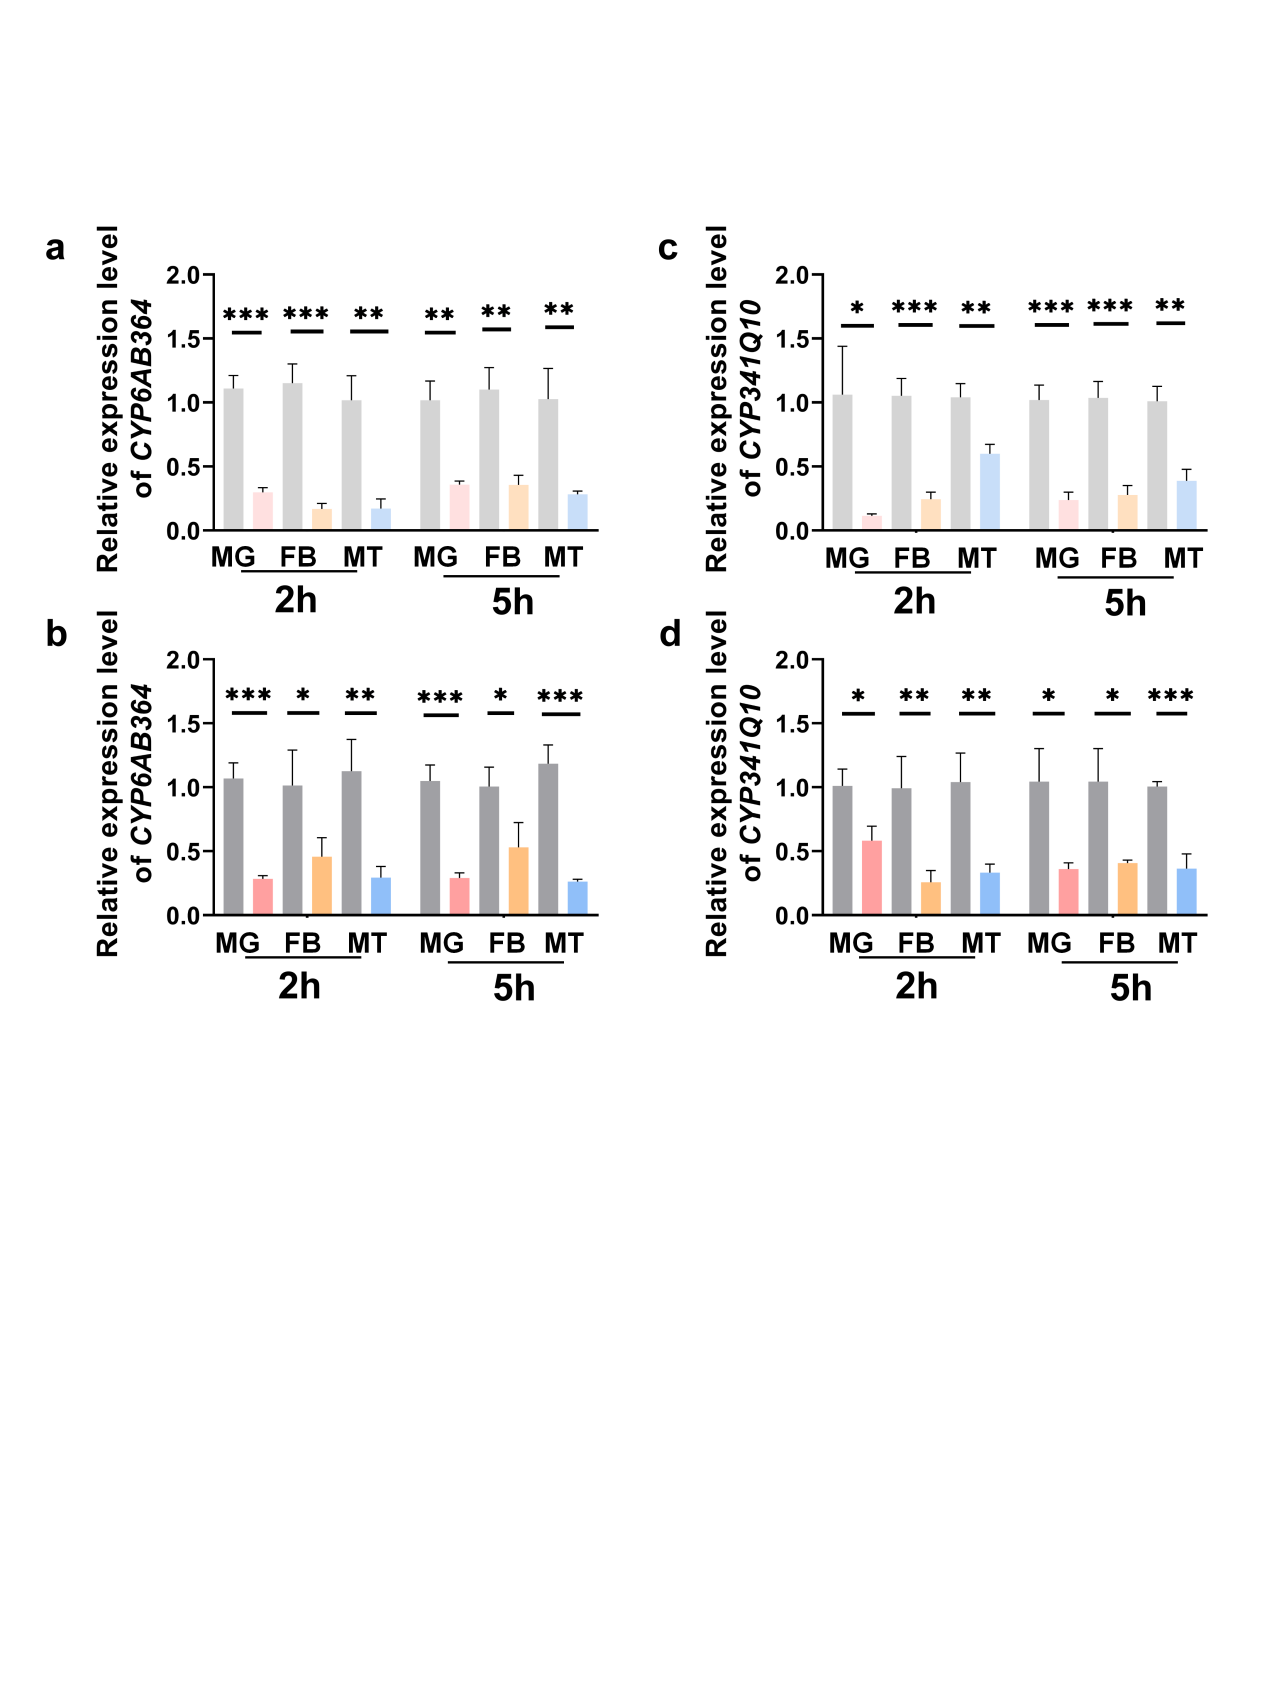


**Figure S8. RNAi efficiency of P450 gene in tissues of *G. molesta*.** a and c, Detection of *CYP6AB364* and *CYP341Q10* interference efficiency of *G. molesta* in quercetin-non-adapted strains (QNA). b and d, Detection of *CYP6AB364* and *CYP341Q10* interference efficiency of *G. molesta* in quercetin-adapted strains (QA). All data were presented as the mean of three replicates ± standard deviation (SD), the differences between different groups were based on Student’ s *t* test (*****P* < 0.0001; ****P* < 0.001; ***P* < 0.01; **P* < 0.05). Data were calculated based on the 2−ΔΔCt method with normalization. HE; Head; MG; Midgut; FB; Fat Body; MT: Malpighian Tubules; CU: Cuticle. All data were visualized using GraphPad Prism 9 software (GraphPad Software, CA).


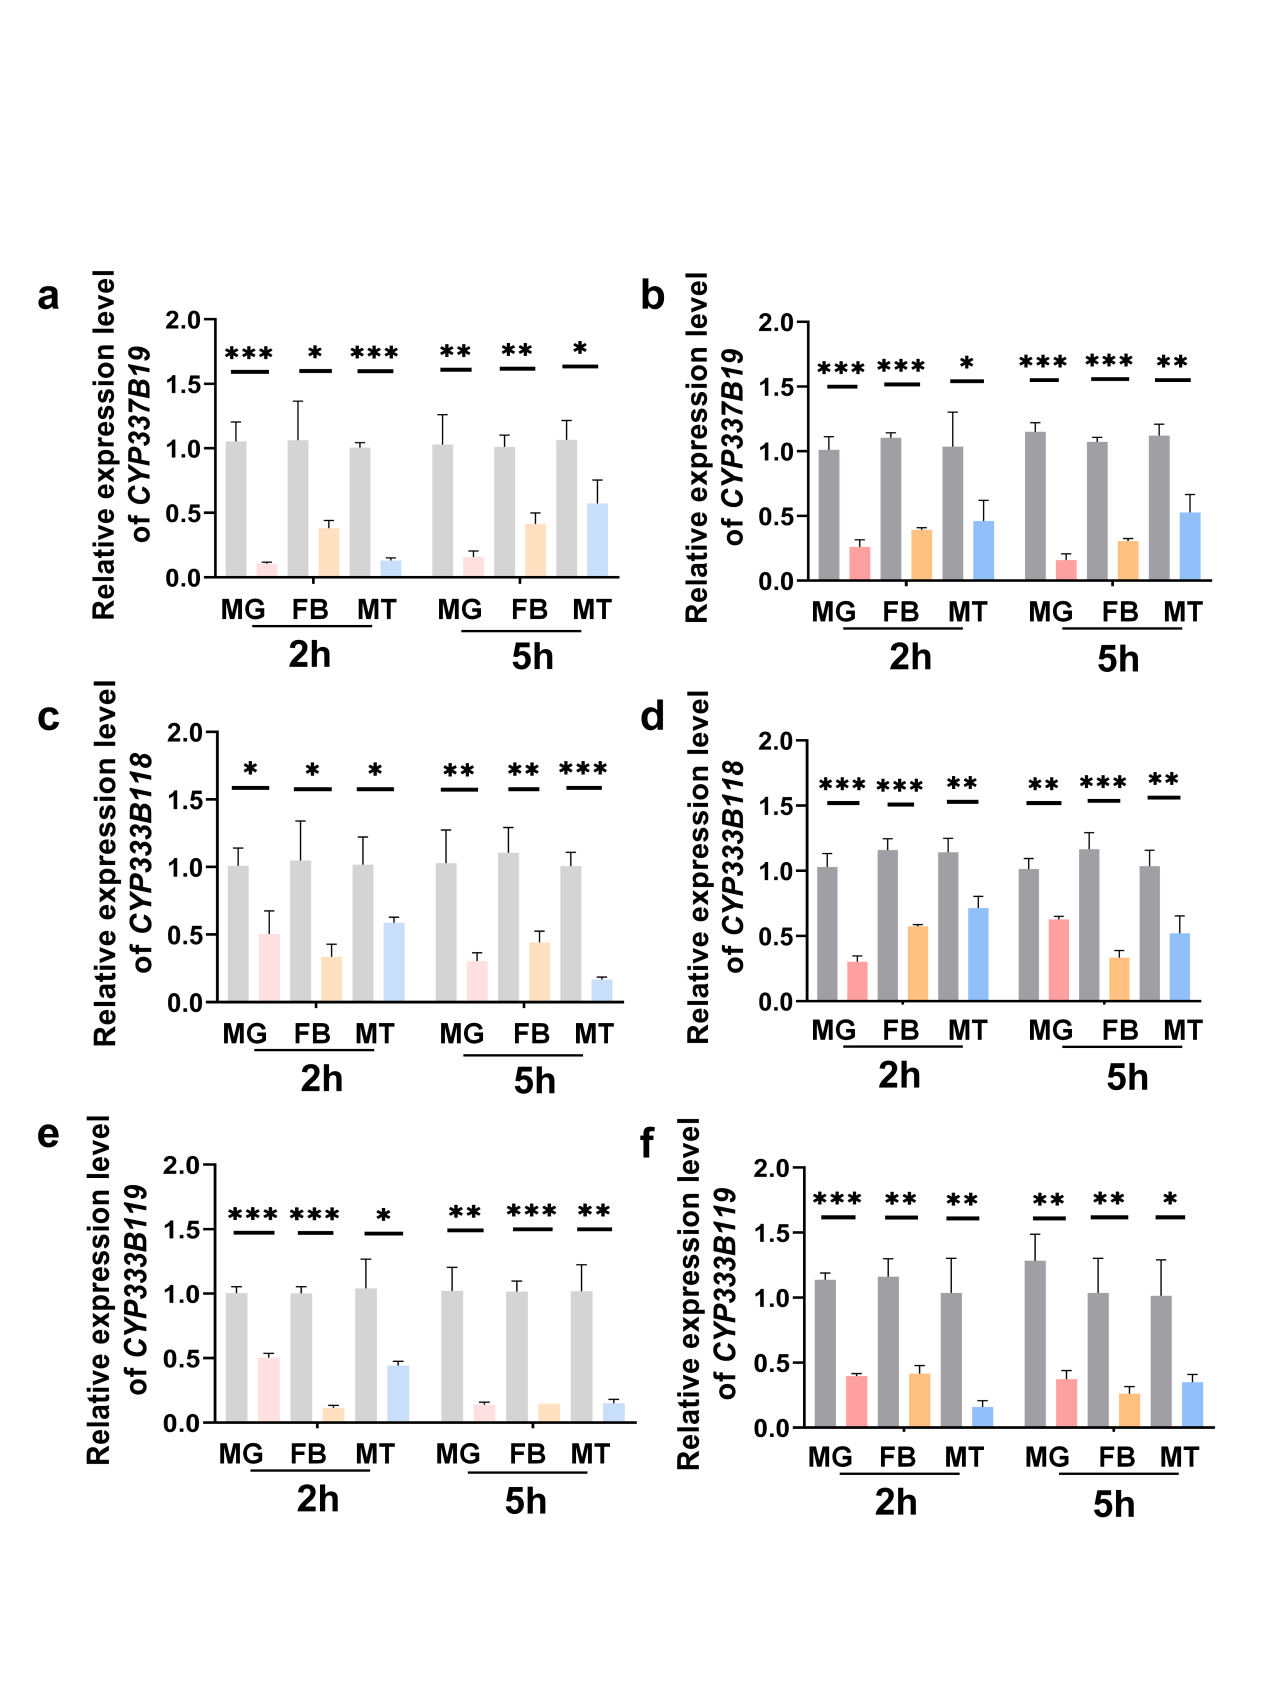


**Figure S9.** **RNAi efficiency of P450 gene in tissues of *C. pomonella*.** a, c, and e, Detection of *CYP337B19*, *CYP333B118, and CYP333B119* interference efficiency of *C. pomonella* in quercetin-non-adapted strains (QNA). b, d, and f, Detection of *CYP337B19*, *CYP333B118, and CYP333B119* interference efficiency of *C. pomonella* in quercetin-adapted strains (QA). Data were calculated based on the 2−ΔΔCt method with normalization. All data were presented as the mean of three replicates ± standard deviation (SD), the differences between different groups were based on Student’ s *t* test (*****P* < 0.0001; ****P* < 0.001; ***P* < 0.01; **P* < 0.05). HE; Head; MG; Midgut; FB; Fat Body; MT: Malpighian Tubules; CU: Cuticle. All data were visualized using GraphPad Prism 9 software (GraphPad Software, CA).


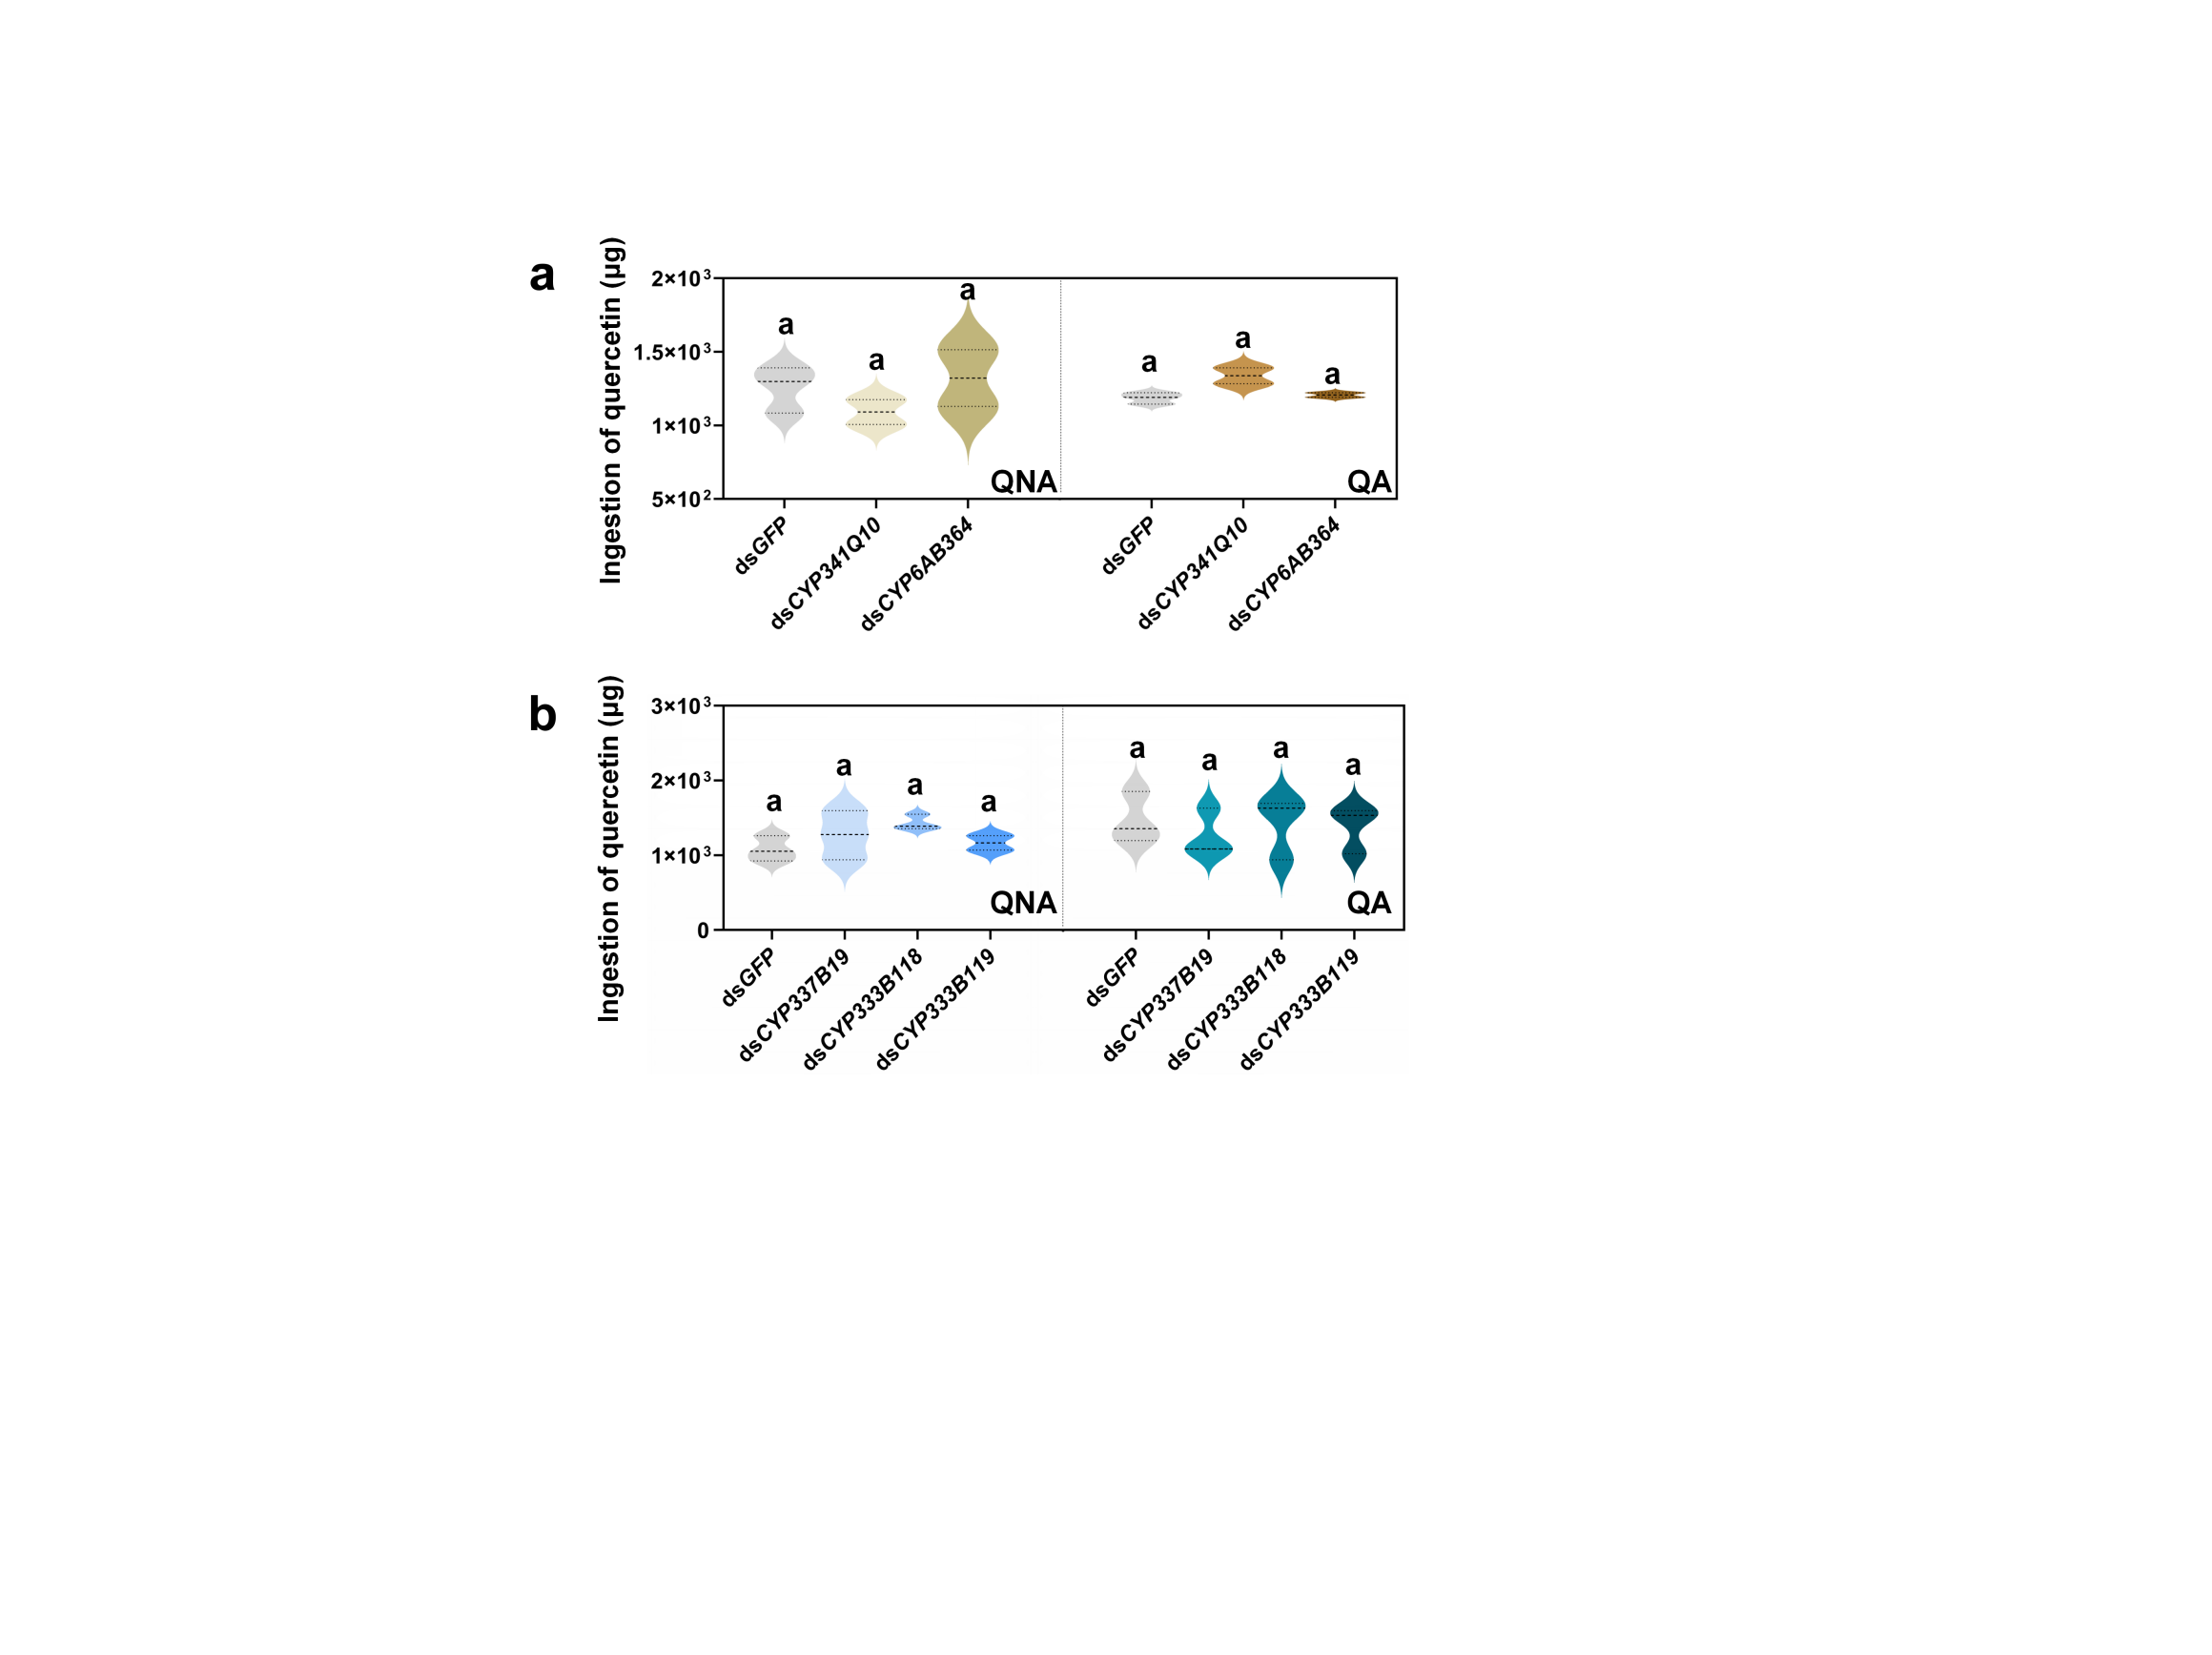


**Figure S10.** **The intake of quercetin of *G. molesta* and *C. pomonella* after RNAi.** a, The intake of quercetin for quercetin-non-adapted (QNA) and quercetin-adapted (QA) strains of *G. molesta* after RNAi of P450 genes. b, The intake of quercetin for quercetin-non-adapted (QNA) and quercetin-adapted (QA) strains of *C. pomonella* after RNAi of P450 genes. All data were presented as the mean of three replicates ± standard deviation (SD), the differences of data among different groups were marked with lower letter based on one-way analysis of variance (ANOVA) (Tukey’s HSD post hoc test, *P* < 0.05) and visualized using GraphPad Prism 9 software (GraphPad Software, CA).

**
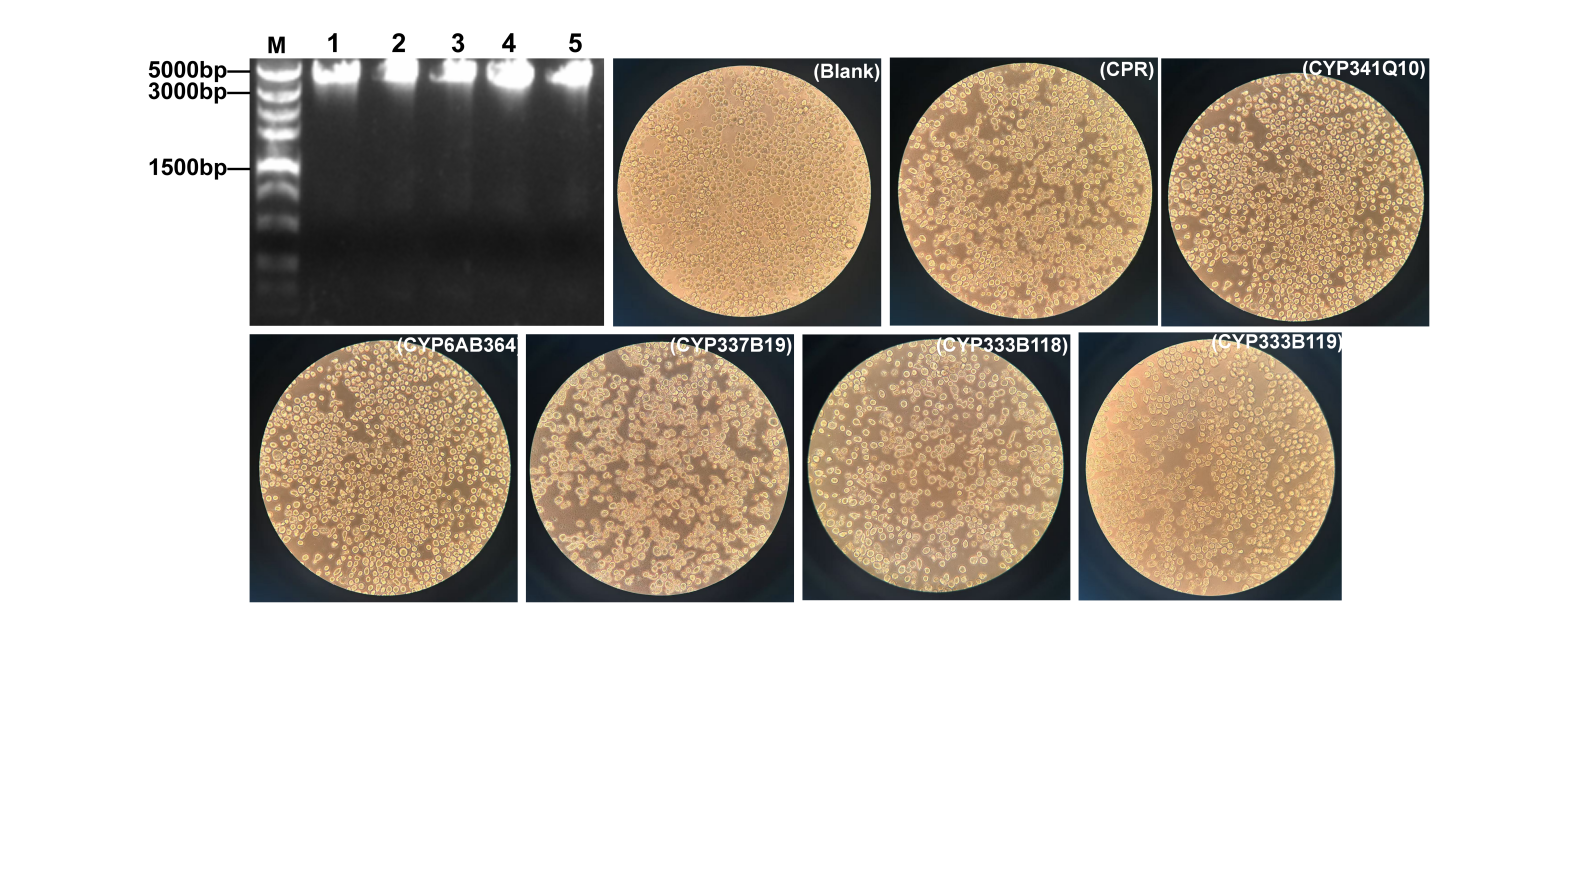
**

**Figure S11. PCR identification of recombinant plasmids and virus infection diagram.** M: 5000 DNA Marker; 1: *pFastBac1-CYP341Q10NT*; 2: *pFastBac1-CYP6AB364NT*; 3: *pFastBac1-CYP337B19NT*; 4: *pFastBac1-CYP333B118NT*; 5: *pFastBac1-CYP333B119NT*.
