# Supplementary material
Source: Research Square preprint supplement (doi:10.21203/rs.3.rs-9176885/v1)

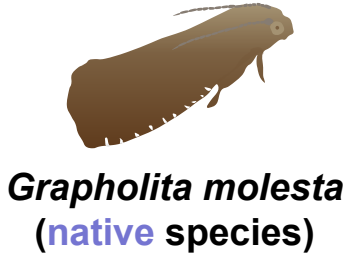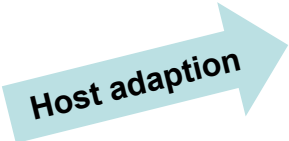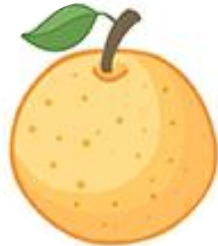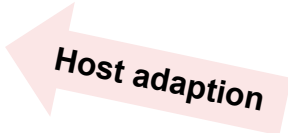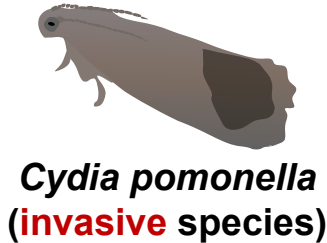

**Plant secondary metabolite (PSM)**

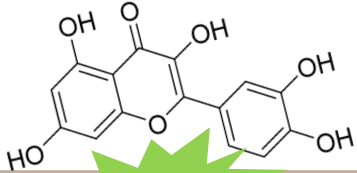

**Quercetin**

**P450-mediated detoxification**

**canonical detoxifying P450**

**CYP341Q10** (CYP4 clan)      **CYP6AB364** (CYP3 clan)

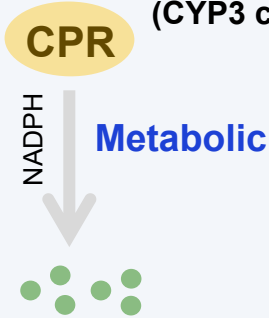

**neofunctionalization P450**

**CYP333B119** (mito clan)      **CYP333B118** (mito clan)

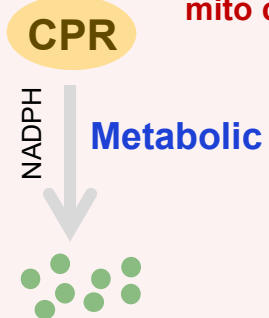

Supplement: Supplementary file 2 [file a20a7326539eb568ceef96c0.pdf]
